# Supplementary material
Source: PubMed Central journal article supplement (PMC6983735)
Supplement: Supp_Table1.pdf [file Supp_Table1.pdf]

## Supplementary Data

SUPPLEMENTARY TABLE S1. TRAINING AND PERCEPTIONS OF COWORKER STIGMA AMONG 1557 HEALTH WORKERS WHO PROVIDE HIV-RELATED SERVICES BY COUNTRY

|                                                                                                                    | <i>Cadre of health worker</i>   |                                  |                                 | <i>p</i> | <i>Country</i>                      |                                          | <i>p</i> |
|--------------------------------------------------------------------------------------------------------------------|---------------------------------|----------------------------------|---------------------------------|----------|-------------------------------------|------------------------------------------|----------|
|                                                                                                                    | <i>HFS</i><br>(n=736),<br>n (%) | <i>CHiP</i><br>(n=601),<br>n (%) | <i>CHW</i><br>(n=220),<br>n (%) |          | <i>Zambia</i><br>(n=1051),<br>n (%) | <i>South Africa</i><br>(n=506),<br>n (%) |          |
| Did you ever receive training in infection control and universal precautions (including PEP and waste management)? |                                 |                                  |                                 | 0.003    |                                     |                                          | <0.001   |
| No                                                                                                                 | 169 (23.0)                      | 135 (22.5)                       | 63 (28.6)                       |          | 258 (24.5)                          | 109 (21.5)                               |          |
| Yes                                                                                                                | 532 (72.3)                      | 419 (69.7)                       | 134 (60.9)                      |          | 747 (71.1)                          | 338 (66.8)                               |          |
| Missing                                                                                                            | 35 (4.8)                        | 47 (7.8)                         | 23 (10.5)                       |          | 46 (4.4)                            | 59 (11.7)                                |          |
| Did you ever receive training in client confidentiality?                                                           |                                 |                                  |                                 | <0.001   |                                     |                                          | 0.163    |
| No                                                                                                                 | 34 (4.6)                        | 3 (0.5)                          | 16 (7.3)                        |          | 35 (3.3)                            | 18 (3.6)                                 |          |
| Yes                                                                                                                | 687 (93.3)                      | 598 (99.5)                       | 200 (90.9)                      |          | 1007 (95.8)                         | 478 (94.5)                               |          |
| Missing                                                                                                            | 15 (2.0)                        | 0 (0.0)                          | 4 (1.8)                         |          | 9 (0.9)                             | 10 (2.0)                                 |          |
| Did you ever receive training in providing reproductive health services and information to young people?           |                                 |                                  |                                 | 0.154    |                                     |                                          | 0.002    |
| No                                                                                                                 | 117 (15.9)                      | 78 (13.0)                        | 25 (11.4)                       |          | 170 (16.2)                          | 50 (9.9)                                 |          |
| Yes                                                                                                                | 606 (82.3)                      | 516 (85.9)                       | 194 (88.2)                      |          | 865 (82.3)                          | 451 (89.1)                               |          |
| Missing                                                                                                            | 13 (1.8)                        | 7 (1.2)                          | 1 (0.5)                         |          | 16 (1.5)                            | 5 (1.0)                                  |          |
| Did you ever receive training in HIV-related stigma and discrimination in the workplace?                           |                                 |                                  |                                 | <0.001   |                                     |                                          | <0.001   |
| No                                                                                                                 | 209 (28.4)                      | 101 (16.8)                       | 60 (27.3)                       |          | 247 (23.5)                          | 123 (24.3)                               |          |
| Yes                                                                                                                | 508 (69.0)                      | 482 (80.2)                       | 156 (70.9)                      |          | 789 (75.1)                          | 357 (70.6)                               |          |
| Missing                                                                                                            | 19 (2.6)                        | 18 (3.0)                         | 4 (1.8)                         |          | 15 (1.4)                            | 26 (5.1)                                 |          |
| Did you ever receive training in providing health services to women who sell sex?                                  |                                 |                                  |                                 | <0.001   |                                     |                                          | <0.001   |
| No                                                                                                                 | 306 (41.6)                      | 142 (23.6)                       | 69 (31.4)                       |          | 343 (32.6)                          | 174 (34.4)                               |          |
| Yes                                                                                                                | 394 (53.5)                      | 430 (71.5)                       | 138 (62.7)                      |          | 680 (64.7)                          | 282 (55.7)                               |          |
| Missing                                                                                                            | 36 (4.9)                        | 29 (4.8)                         | 13 (5.9)                        |          | 28 (2.7)                            | 50 (9.9)                                 |          |
| Did you ever receive training in providing health services to MSM?                                                 |                                 |                                  |                                 | <0.001   |                                     |                                          | <0.001   |
| No                                                                                                                 | 388 (52.7)                      | 193 (32.1)                       | 80 (36.4)                       |          | 516 (49.1)                          | 145 (28.7)                               |          |
| Yes                                                                                                                | 318 (43.2)                      | 375 (62.4)                       | 127 (57.7)                      |          | 502 (47.8)                          | 318 (62.8)                               |          |
| Missing                                                                                                            | 30 (4.1)                        | 33 (5.5)                         | 13 (5.9)                        |          | 33 (3.1)                            | 43 (8.5)                                 |          |

(continued)

SUPPLEMENTARY TABLE S1. (CONTINUED)

|                                                                                                     | <i>Cadre of health worker</i>                   |                                                  |                                                 | <i>p</i>     | <i>Country</i>                                      |                                                          | <i>p</i>         |
|-----------------------------------------------------------------------------------------------------|-------------------------------------------------|--------------------------------------------------|-------------------------------------------------|--------------|-----------------------------------------------------|----------------------------------------------------------|------------------|
|                                                                                                     | <i>HFS</i><br>( <i>n</i> =736),<br><i>n</i> (%) | <i>CHiP</i><br>( <i>n</i> =601),<br><i>n</i> (%) | <i>CHW</i><br>( <i>n</i> =220),<br><i>n</i> (%) |              | <i>Zambia</i><br>( <i>n</i> =1051),<br><i>n</i> (%) | <i>South Africa</i><br>( <i>n</i> =506),<br><i>n</i> (%) |                  |
| My coworkers sometimes treat people living with HIV poorly when providing them with health services |                                                 |                                                  |                                                 | 0.121        |                                                     |                                                          | <b>&lt;0.001</b> |
| Strongly disagree                                                                                   | 265 (36.0)                                      | 240 (39.9)                                       | 73 (33.2)                                       |              | 356 (33.9)                                          | 222 (43.9)                                               |                  |
| Disagree                                                                                            | 333 (45.2)                                      | 269 (44.8)                                       | 101 (45.9)                                      |              | 487 (46.3)                                          | 216 (42.7)                                               |                  |
| Agree                                                                                               | 88 (12.0)                                       | 58 (9.7)                                         | 34 (15.5)                                       |              | 151 (14.4)                                          | 29 (5.7)                                                 |                  |
| Strongly agree                                                                                      | 25 (3.4)                                        | 13 (2.2)                                         | 2 (0.9)                                         |              | 30 (2.9)                                            | 10 (2.0)                                                 |                  |
| Missing                                                                                             | 25 (3.4)                                        | 21 (3.5)                                         | 10 (4.5)                                        |              | 27 (2.6)                                            | 29 (5.7)                                                 |                  |
| My coworkers sometimes talk badly about people thought to be living with HIV                        |                                                 |                                                  |                                                 | 0.322        |                                                     |                                                          | <b>&lt;0.001</b> |
| Strongly disagree                                                                                   | 146 (19.8)                                      | 135 (22.5)                                       | 46 (20.9)                                       |              | 185 (17.6)                                          | 142 (28.1)                                               |                  |
| Disagree                                                                                            | 347 (47.1)                                      | 270 (44.9)                                       | 103 (46.8)                                      |              | 472 (44.9)                                          | 248 (49.0)                                               |                  |
| Agree                                                                                               | 177 (24.0)                                      | 136 (22.6)                                       | 43 (19.5)                                       |              | 287 (27.3)                                          | 69 (13.6)                                                |                  |
| Strongly agree                                                                                      | 54 (7.3)                                        | 41 (6.8)                                         | 23 (10.5)                                       |              | 94 (8.9)                                            | 24 (4.7)                                                 |                  |
| Missing                                                                                             | 12 (1.6)                                        | 19 (3.2)                                         | 5 (2.3)                                         |              | 13 (1.2)                                            | 23 (4.5)                                                 |                  |
| My coworkers sometimes treat women who sell sex poorly when providing them with health services     |                                                 |                                                  |                                                 | 0.242        |                                                     |                                                          | <b>&lt;0.001</b> |
| Strongly disagree                                                                                   | 185 (25.1)                                      | 128 (21.3)                                       | 50 (22.7)                                       |              | 240 (22.8)                                          | 123 (24.3)                                               |                  |
| Disagree                                                                                            | 365 (49.6)                                      | 346 (57.6)                                       | 115 (52.3)                                      |              | 554 (52.7)                                          | 272 (53.8)                                               |                  |
| Agree                                                                                               | 97 (13.2)                                       | 70 (11.6)                                        | 29 (13.2)                                       |              | 160 (15.2)                                          | 36 (7.1)                                                 |                  |
| Strongly agree                                                                                      | 37 (5.0)                                        | 26 (4.3)                                         | 14 (6.4)                                        |              | 57 (5.4)                                            | 20 (4.0)                                                 |                  |
| Missing                                                                                             | 52 (7.1)                                        | 31 (5.2)                                         | 12 (5.5)                                        |              | 40 (3.8)                                            | 55 (10.9)                                                |                  |
| My coworkers sometimes talk badly about women who sell sex                                          |                                                 |                                                  |                                                 | <b>0.004</b> |                                                     |                                                          | <b>&lt;0.001</b> |
| Strongly disagree                                                                                   | 65 (8.8)                                        | 45 (7.5)                                         | 26 (11.8)                                       |              | 86 (8.2)                                            | 50 (9.9)                                                 |                  |
| Disagree                                                                                            | 178 (24.2)                                      | 200 (33.3)                                       | 76 (34.5)                                       |              | 256 (24.4)                                          | 198 (39.1)                                               |                  |
| Agree                                                                                               | 316 (42.9)                                      | 225 (37.4)                                       | 80 (36.4)                                       |              | 480 (45.7)                                          | 141 (27.9)                                               |                  |
| Strongly agree                                                                                      | 121 (16.4)                                      | 93 (15.5)                                        | 27 (12.3)                                       |              | 187 (17.8)                                          | 54 (10.7)                                                |                  |
| Missing                                                                                             | 56 (7.6)                                        | 38 (6.3)                                         | 11 (5.0)                                        |              | 42 (4.0)                                            | 63 (12.5)                                                |                  |
| My coworkers sometimes treat MSM poorly when providing them with health services                    |                                                 |                                                  |                                                 | <b>0.001</b> |                                                     |                                                          | <b>&lt;0.001</b> |
| Strongly disagree                                                                                   | 189 (25.7)                                      | 116 (19.3)                                       | 37 (16.8)                                       |              | 233 (22.2)                                          | 109 (21.5)                                               |                  |
| Disagree                                                                                            | 362 (49.2)                                      | 353 (58.7)                                       | 121 (55.0)                                      |              | 539 (51.3)                                          | 297 (58.7)                                               |                  |
| Agree                                                                                               | 72 (9.8)                                        | 52 (8.7)                                         | 35 (15.9)                                       |              | 122 (11.6)                                          | 37 (7.3)                                                 |                  |
| Strongly agree                                                                                      | 50 (6.8)                                        | 37 (6.2)                                         | 16 (7.3)                                        |              | 86 (8.2)                                            | 17 (3.4)                                                 |                  |
| Missing                                                                                             | 63 (8.6)                                        | 43 (7.2)                                         | 11 (5.0)                                        |              | 71 (6.8)                                            | 46 (9.1)                                                 |                  |

(continued)

SUPPLEMENTARY TABLE S1. (CONTINUED)

|                                                                                                                              | <i>Cadre of health worker</i>   |                                  |                                 | <i>p</i>     | <i>Country</i>                      |                                          | <i>p</i>         |
|------------------------------------------------------------------------------------------------------------------------------|---------------------------------|----------------------------------|---------------------------------|--------------|-------------------------------------|------------------------------------------|------------------|
|                                                                                                                              | <i>HFS</i><br>(n=736),<br>n (%) | <i>CHiP</i><br>(n=601),<br>n (%) | <i>CHW</i><br>(n=220),<br>n (%) |              | <i>Zambia</i><br>(n=1051),<br>n (%) | <i>South Africa</i><br>(n=506),<br>n (%) |                  |
| My coworkers sometimes talk badly about men who are thought to have sex with men                                             |                                 |                                  |                                 | <b>0.019</b> |                                     |                                          | <b>&lt;0.001</b> |
| Strongly disagree                                                                                                            | 80 (10.9)                       | 49 (8.2)                         | 21 (9.5)                        |              | 73 (6.9)                            | 77 (15.2)                                |                  |
| Disagree                                                                                                                     | 190 (25.8)                      | 211 (35.1)                       | 76 (34.5)                       |              | 256 (24.4)                          | 221 (43.7)                               |                  |
| Agree                                                                                                                        | 272 (37.0)                      | 210 (34.9)                       | 76 (34.5)                       |              | 434 (41.3)                          | 124 (24.5)                               |                  |
| Strongly agree                                                                                                               | 141 (19.2)                      | 90 (15.0)                        | 36 (16.4)                       |              | 225 (21.4)                          | 42 (8.3)                                 |                  |
| Missing                                                                                                                      |                                 |                                  |                                 |              | 63 (6.0)                            | 42 (8.3)                                 |                  |
| My coworkers sometimes treat young women who become pregnant before marriage poorly when providing them with health services |                                 |                                  |                                 | 0.197        |                                     |                                          | <b>&lt;0.001</b> |
| Strongly disagree                                                                                                            | 196 (26.6)                      | 140 (23.3)                       | 47 (21.4)                       |              | 248 (23.6)                          | 135 (26.7)                               |                  |
| Disagree                                                                                                                     | 372 (50.5)                      | 339 (56.4)                       | 114 (51.8)                      |              | 535 (50.9)                          | 290 (57.3)                               |                  |
| Agree                                                                                                                        | 124 (16.8)                      | 81 (13.5)                        | 45 (20.5)                       |              | 205 (19.5)                          | 45 (8.9)                                 |                  |
| Strongly agree                                                                                                               | 21 (2.9)                        | 22 (3.7)                         | 8 (3.6)                         |              | 42 (4.0)                            | 9 (1.8)                                  |                  |
| Missing                                                                                                                      | 23 (3.1)                        | 19 (3.2)                         | 6 (2.7)                         |              | 21 (2.0)                            | 27 (5.3)                                 |                  |
| My coworkers sometimes talk badly about young women who become pregnant before marriage                                      |                                 |                                  |                                 | <b>0.005</b> |                                     |                                          | <b>&lt;0.001</b> |
| Strongly disagree                                                                                                            | 119 (16.2)                      | 88 (14.6)                        | 31 (14.1)                       |              | 133 (12.7)                          | 105 (20.8)                               |                  |
| Disagree                                                                                                                     | 265 (36.0)                      | 269 (44.8)                       | 96 (43.6)                       |              | 366 (34.8)                          | 264 (52.2)                               |                  |
| Agree                                                                                                                        | 275 (37.4)                      | 184 (30.6)                       | 60 (27.3)                       |              | 428 (40.7)                          | 91 (18.0)                                |                  |
| Strongly agree                                                                                                               | 48 (6.5)                        | 36 (6.0)                         | 25 (11.4)                       |              | 90 (8.6)                            | 19 (3.8)                                 |                  |
| Missing                                                                                                                      | 29 (3.9)                        | 24 (4.0)                         | 8 (3.6)                         |              | 34 (3.2)                            | 27 (5.3)                                 |                  |

CHiP, community HIV care provider; CHW, community-based health worker; HFS, health facility staff; MSM, men who have sex with men; PEP, postexposure prophylaxis.  
*p*-Values marked in bold indicate numbers that are significant on the 95% confidence limit.
