# Supplementary material
Source: PubMed Central journal article supplement (PMC6983735)
Supplement: Supp_Table2.pdf [file Supp_Table2.pdf]

SUPPLEMENTARY TABLE S2. THE ASSOCIATION BETWEEN SOCIODEMOGRAPHIC CHARACTERISTICS OF HEALTH WORKERS WITH FOUR STIGMA OUTCOMES FOR WOMEN WHO SELL SEX

| Variable       | Categories                 | <i>I would be ashamed if a woman in my family sold sex</i> |                            |                             | <i>Other people deserve access to health services more than women who sell sex</i> |                            |                             | <i>If I had a choice, I would prefer not to provide services to women who sell sex</i> |                            |                             | <i>Women who sell sex engage in irresponsible behaviors</i> |                            |                             |
|----------------|----------------------------|------------------------------------------------------------|----------------------------|-----------------------------|------------------------------------------------------------------------------------|----------------------------|-----------------------------|----------------------------------------------------------------------------------------|----------------------------|-----------------------------|-------------------------------------------------------------|----------------------------|-----------------------------|
|                |                            | n/N (%) <sup>*</sup>                                       | aOR (95% CIs) <sup>†</sup> | p <sub>w</sub> <sup>‡</sup> | n/N (%) <sup>*</sup>                                                               | aOR (95% CIs) <sup>†</sup> | p <sub>w</sub> <sup>‡</sup> | n/N (%) <sup>*</sup>                                                                   | aOR (95% CIs) <sup>†</sup> | p <sub>w</sub> <sup>‡</sup> | n/N (%) <sup>*</sup>                                        | aOR (95% CIs) <sup>†</sup> | p <sub>w</sub> <sup>‡</sup> |
| Sex            | Male                       | 305/389 (78.4)                                             | 1                          | 0.853                       | 60/389 (15.4)                                                                      | 1                          | 0.875                       | 33/389 (8.5)                                                                           | 1                          | 0.665                       | 295/389 (75.8)                                              | 1                          | 0.799                       |
|                | Female                     | 795/1019 (78.0)                                            | 0.97 (0.69–1.35)           |                             | 158/1019 (15.5)                                                                    | 0.98 (0.74–1.30)           |                             | 85/1019 (8.3)                                                                          | 0.94 (0.69–1.26)           |                             | 767/1019 (75.3)                                             | 0.95 (0.65–1.40)           |                             |
| Age            | <25 years                  | 93/115 (80.9)                                              | 1                          | 0.782                       | 20/115 (17.4)                                                                      | 1                          | 0.111                       | 13/115 (11.3)                                                                          | 1                          | 0.210                       | 91/115 (79.1)                                               | 1                          | 0.298                       |
|                | 25–34 years                | 371/481 (77.1)                                             | 0.80 (0.47–1.36)           |                             | 63/481 (13.1)                                                                      | 0.71 (0.48–1.07)           |                             | 29/481 (6.0)                                                                           | 0.50 (0.23–1.11)           |                             | 350/481 (72.8)                                              | 0.70 (0.45–1.11)           |                             |
|                | 35–44 years                | 279/360 (77.5)                                             | 0.82 (0.39–1.70)           |                             | 57/360 (15.8)                                                                      | 0.89 (0.51–1.56)           |                             | 31/360 (8.6)                                                                           | 0.74 (0.42–1.32)           |                             | 279/360 (77.5)                                              | 0.91 (0.50–1.66)           |                             |
|                | >44 years                  | 357/452 (79.0)                                             | 0.89 (0.45–1.75)           |                             | 78/452 (17.3)                                                                      | 0.99 (0.59–1.67)           |                             | 45/452 (10.0)                                                                          | 0.87 (0.43–1.77)           |                             | 342/452 (75.7)                                              | 0.82 (0.44–1.54)           |                             |
| Education      | Did not complete secondary | 49/68 (72.1)                                               | 1                          | <b>&lt;0.001</b>            | 13/68 (19.1)                                                                       | 1                          | <b>0.001</b>                | 10/68 (14.7)                                                                           | 1                          | <b>&lt;0.001</b>            | 43/68 (63.2)                                                | 1                          | <b>&lt;0.001</b>            |
|                | Completed secondary        | 468/624 (75.0)                                             | 1.26 (0.80–1.97)           |                             | 121/624 (19.4)                                                                     | 1.05 (0.54–2.01)           |                             | 68/624 (10.9)                                                                          | 0.73 (0.25–2.13)           |                             | 430/624 (68.9)                                              | 1.47 (0.81–2.66)           |                             |
| Marital status | Further                    | 583/716 (81.4)                                             | 1.91 (1.14–3.20)           |                             | 84/716 (11.7)                                                                      | 0.59 (0.35–1.01)           |                             | 40/716 (5.6)                                                                           | 0.37 (0.14–0.94)           |                             | 589/716 (82.3)                                              | 3.31 (1.99–5.50)           |                             |
|                | Married                    | 584/749 (78.0)                                             | 1.00                       | 0.960                       | 119/749 (15.9)                                                                     | 1.00                       | 0.755                       | 64/749 (8.5)                                                                           | 1.00                       | 0.826                       | 568/749 (75.8)                                              | 1                          | 0.798                       |
| Religion       | Not married                | 516/659 (78.3)                                             | 1.00 (0.85–1.19)           |                             | 99/659 (15.0)                                                                      | 0.95 (0.66–1.35)           |                             | 54/659 (8.2)                                                                           | 0.96 (0.65–1.41)           |                             | 494/659 (75.0)                                              | 0.96 (0.69–1.33)           |                             |
|                | Very important             | 964/1226 (78.6)                                            | 1                          | 0.806                       | 193/1226 (15.7)                                                                    | 1                          | <b>0.043</b>                | 100/1226 (8.2)                                                                         | 1                          | <b>0.010</b>                | 933/1226 (76.1)                                             | 1                          | 0.770                       |
| Ever tested    | Important                  | 110/149 (73.8)                                             | 0.91 (0.61–1.37)           |                             | 19/149 (12.8)                                                                      | 0.81 (0.48–1.36)           |                             | 13/149 (8.7)                                                                           | 1.14 (0.61–2.14)           |                             | 106/149 (71.1)                                              | 1.09 (0.72–1.63)           |                             |
|                | Somewhat important         | 14/17 (82.4)                                               | 1.66 (0.46–5.91)           |                             | 6/17 (35.3)                                                                        | 3.45 (1.21–9.84)           |                             | 5/17 (29.4)                                                                            | 5.63 (1.85–17.17)          |                             | 10/17 (58.8)                                                | 0.78 (0.28–2.19)           |                             |
| HIV status     | Not important              | 10/14 (71.4)                                               | 0.79 (0.24–2.63)           |                             | 0/14 (0.0)                                                                         | —                          |                             | 0/14 (0.0)                                                                             | -                          |                             | 11/14 (78.6)                                                | 1.79 (0.47–6.83)           |                             |
|                | Missing                    | 2/2 (100.0)                                                |                            |                             | 0/2 (0.0)                                                                          |                            |                             | 0/2 (0.0)                                                                              |                            |                             | 2/2 (100.0)                                                 |                            |                             |
| Ever tested    | No                         | 20/27 (74.1)                                               | 1                          | 0.618                       | 8/27 (29.6)                                                                        | 1                          | 0.121                       | 6/27 (22.2)                                                                            | 1                          | <b>0.032</b>                | 20/27 (74.1)                                                | 1                          | 0.806                       |
|                | Yes                        | 1073/1374 (78.1)                                           | 1.27 (0.49–3.28)           |                             | 210/1374 (15.3)                                                                    | 0.45 (0.16–1.23)           |                             | 112/1374 (8.2)                                                                         | 0.33 (0.12–0.91)           |                             | 1035/1374 (75.3)                                            | 1.10 (0.52–2.35)           |                             |
| HIV status     | Missing                    | 7/7 (100.0)                                                |                            |                             | 0/7 (0.0)                                                                          |                            |                             | 0/7 (0.0)                                                                              |                            |                             | 7/7 (100.0)                                                 |                            |                             |
|                | Negative                   | 789/1003 (78.7)                                            | 1                          | 0.530                       | 145/1003 (14.5)                                                                    | 1                          | 0.288                       | 83/1003 (8.3)                                                                          | 1                          | 0.348                       | 768/1003 (76.6)                                             | 1                          | <b>0.028</b>                |
| HIV status     | Positive                   | 198/257 (77.0)                                             | 0.90 (0.65–1.25)           |                             | 46/257 (17.9)                                                                      | 1.25 (0.83–1.87)           |                             | 18/257 (7.0)                                                                           | 0.78 (0.47–1.30)           |                             | 175/257 (68.1)                                              | 0.63 (0.42–0.95)           |                             |
|                | Undetermined               | 5/8 (62.5)                                                 |                            |                             | 1/8 (12.5)                                                                         |                            |                             | 1/8 (12.5)                                                                             |                            |                             | 8/8 (100.0)                                                 |                            |                             |
|                | Missing                    | 108/140 (77.1)                                             |                            |                             | 26/140 (18.6)                                                                      |                            |                             | 16/140 (11.4)                                                                          |                            |                             | 111/140 (79.3)                                              |                            |                             |

\*Proportion of health workers responding strongly agree or agree.

†The aOR for sex is adjusted for age group; the aOR for age group is adjusted for sex; the aOR for all other predictor variables is adjusted for sex and age group.

‡A p value of <0.05 indicates that the predictor creates a statistically significant improvement in the fit of the model.

aOR, adjusted odds ratio; CIs, confidence intervals; n, number of individuals reporting four types of stigma within groups; N, total number of individuals within groups; p<sub>w</sub>, p value of the Wald test. p-Values marked in bold indicate numbers that are significant on the 95% confidence limit.
