# Supplementary material
Source: PubMed Central journal article supplement (PMC6983735)
Supplement: Supp_Table3.pdf [file Supp_Table3.pdf]

SUPPLEMENTARY TABLE S3. THE ASSOCIATION BETWEEN HEALTH WORKER TRAINING, PERCEPTIONS OF COWORKER ATTITUDES, AND STIGMATIZING ATTITUDES WITH FOUR STIGMA OUTCOMES FOR WOMEN WHO SELL SEX

| Variable                                                                | Categories        | <i>I would be ashamed if a woman in my family sold sex</i> |                            |                             | <i>Other people deserve access to health services more than women who sell sex</i> |                            |                             | <i>If I had a choice, I would prefer not to provide services to women who sell sex</i> |                            |                             | <i>Women who sell sex engage in irresponsible behaviors</i> |                            |                             |
|-------------------------------------------------------------------------|-------------------|------------------------------------------------------------|----------------------------|-----------------------------|------------------------------------------------------------------------------------|----------------------------|-----------------------------|----------------------------------------------------------------------------------------|----------------------------|-----------------------------|-------------------------------------------------------------|----------------------------|-----------------------------|
|                                                                         |                   | n/N (%) <sup>*</sup>                                       | aOR (95% CIs) <sup>†</sup> | p <sub>w</sub> <sup>‡</sup> | n/N (%) <sup>*</sup>                                                               | aOR (95% CIs) <sup>†</sup> | p <sub>w</sub> <sup>‡</sup> | n/N (%) <sup>*</sup>                                                                   | aOR (95% CIs) <sup>†</sup> | p <sub>w</sub> <sup>‡</sup> | n/N (%) <sup>*</sup>                                        | aOR (95% CIs) <sup>†</sup> | p <sub>w</sub> <sup>‡</sup> |
| Training on infection control <sup>a</sup>                              | No                | 261/334 (78.1)                                             | 1                          | 0.794                       | 40/334 (12.0)                                                                      | 1                          | 0.206                       | 27/334 (8.1)                                                                           | 1                          | 0.749                       | 266/334 (79.6)                                              | 1                          | 0.092                       |
|                                                                         | Yes               | 789/1001 (78.8)                                            | 1.04 (0.79–1.35)           |                             | 159/1001 (15.9)                                                                    | 1.36 (0.85–2.17)           |                             | 79/1001 (7.9)                                                                          | 0.93 (0.59–1.46)           |                             | 744/1001 (74.3)                                             | 0.73 (0.50–1.05)           |                             |
|                                                                         | Missing           | 50/73 (68.5)                                               |                            |                             | 19/73 (26.0)                                                                       |                            |                             | 12/73 (16.4)                                                                           |                            |                             | 52/73 (71.2)                                                |                            |                             |
| My coworkers sometimes treat people living with HIV poorly <sup>b</sup> | Strongly disagree | 398/524 (76.0)                                             | 1                          | <b>0.048</b>                | 54/524 (10.3)                                                                      | 1                          | <b>&lt;0.001</b>            | 28/524 (5.3)                                                                           | 1                          | <b>&lt;0.001</b>            | 357/524 (68.1)                                              | 1                          | <b>&lt;0.001</b>            |
|                                                                         | Disagree          | 504/653 (77.2)                                             | 1.07 (0.82–1.40)           |                             | 105/653 (16.1)                                                                     | 1.65 (1.10–2.48)           |                             | 50/653 (7.7)                                                                           | 1.45 (0.97–2.16)           |                             | 513/653 (78.6)                                              | 1.70 (1.32–2.18)           |                             |
|                                                                         | Agree             | 144/166 (86.7)                                             | 2.07 (1.22–3.52)           |                             | 42/166 (25.3)                                                                      | 2.96 (1.89–4.63)           |                             | 29/166 (17.5)                                                                          | 3.74 (2.02–6.91)           |                             | 140/166 (84.3)                                              | 2.48 (1.54–3.99)           |                             |
|                                                                         | Strongly agree    | 30/37 (81.1)                                               | 1.36 (0.61–3.00)           |                             | 13/37 (35.1)                                                                       | 4.75 (2.68–8.41)           |                             | 8/37 (21.6)                                                                            | 4.90 (2.00–11.96)          |                             | 28/37 (75.7)                                                | 1.44 (0.61–3.41)           |                             |
| My coworkers sometimes talk badly about PLHIV <sup>c</sup>              | Missing           | 24/28 (85.7)                                               |                            |                             | 4/28 (14.3)                                                                        |                            |                             | 3/28 (10.7)                                                                            |                            |                             | 24/28 (85.7)                                                |                            |                             |
|                                                                         | Strongly disagree | 206/290 (71.0)                                             | 1                          | <b>&lt;0.001</b>            | 28/290 (9.7)                                                                       | 1                          | <b>&lt;0.001</b>            | 14/290 (4.8)                                                                           | 1                          | <b>&lt;0.001</b>            | 196/290 (67.6)                                              | 1                          | <b>&lt;0.001</b>            |
|                                                                         | Disagree          | 509/655 (77.7)                                             | 1.45 (1.04–2.01)           |                             | 97/655 (14.8)                                                                      | 1.63 (0.99–2.70)           |                             | 46/655 (7.0)                                                                           | 1.51 (1.04–2.18)           |                             | 476/655 (72.7)                                              | 1.28 (0.92–1.80)           |                             |
|                                                                         | Agree             | 275/334 (82.3)                                             | 1.92 (1.30–2.83)           |                             | 62/334 (18.6)                                                                      | 2.12 (1.36–3.32)           |                             | 39/334 (11.7)                                                                          | 2.59 (1.60–4.20)           |                             | 289/334 (86.5)                                              | 3.08 (1.99–4.77)           |                             |
| I would be ashamed if someone in my family had HIV <sup>d</sup>         | Strongly agree    | 97/112 (86.6)                                              | 2.68 (1.40–5.10)           |                             | 30/112 (26.8)                                                                      | 3.40 (2.16–5.37)           |                             | 18/112 (16.1)                                                                          | 3.76 (1.73–8.16)           |                             | 89/112 (79.5)                                               | 1.86 (1.21–2.86)           |                             |
|                                                                         | Missing           | 13/17 (76.5)                                               |                            |                             | 1/17 (5.9)                                                                         |                            |                             | 1/17 (5.9)                                                                             |                            |                             | 12/17 (70.6)                                                |                            |                             |
|                                                                         | Strongly disagree | 539/704 (76.6)                                             | 1                          | 0.103                       | 73/704 (10.4)                                                                      | 1                          | <b>&lt;0.001</b>            | 29/704 (4.1)                                                                           | 1                          | <b>&lt;0.001</b>            | 518/704 (73.6)                                              | 1                          | 0.364                       |
|                                                                         | Disagree          | 492/614 (80.1)                                             | 1.23 (1.03–1.46)           |                             | 114/614 (18.6)                                                                     | 1.95 (1.60–2.38)           |                             | 62/614 (10.1)                                                                          | 2.56 (1.88–3.49)           |                             | 476/614 (77.5)                                              | 1.22 (0.97–1.55)           |                             |
|                                                                         | Agree             | 31/39 (79.5)                                               | 1.18 (0.51–2.70)           |                             | 14/39 (35.9)                                                                       | 4.81 (2.45–9.42)           |                             | 13/39 (33.3)                                                                           | 11.49 (6.13–21.53)         |                             | 30/39 (76.9)                                                | 1.16 (0.57–2.35)           |                             |
| PLHIV engage in irresponsible behaviors <sup>e</sup>                    | Strongly agree    | 30/40 (75.0)                                               | 0.89 (0.42–1.89)           |                             | 16/40 (40.0)                                                                       | 5.59 (2.69–11.64)          |                             | 12/40 (30.0)                                                                           | 9.56 (4.36–20.94)          |                             | 31/40 (77.5)                                                | 1.23 (0.62–2.47)           |                             |
|                                                                         | Missing           | 8/11 (72.7)                                                |                            |                             | 1/11 (9.1)                                                                         |                            |                             | 2/11 (18.2)                                                                            |                            |                             | 7/11 (63.6)                                                 |                            |                             |
|                                                                         | Strongly disagree | 255/346 (73.7)                                             | 1                          | <b>0.008</b>                | 36/346 (10.4)                                                                      | 1                          | <b>&lt;0.001</b>            | 12/346 (3.5)                                                                           | 1                          | <b>0.001</b>                | 231/346 (66.8)                                              | 1                          | <b>&lt;0.001</b>            |
|                                                                         | Disagree          | 487/630 (77.3)                                             | 1.22 (0.83–1.79)           |                             | 97/630 (15.4)                                                                      | 1.57 (0.99–2.49)           |                             | 54/630 (8.6)                                                                           | 2.63 (1.22–5.68)           |                             | 476/630 (75.6)                                              | 1.55 (1.09–2.20)           |                             |
|                                                                         | Agree             | 242/299 (80.9)                                             | 1.51 (0.98–2.32)           |                             | 62/299 (20.7)                                                                      | 2.20 (1.57–3.10)           |                             | 36/299 (12.0)                                                                          | 3.74 (1.78–7.87)           |                             | 249/299 (83.3)                                              | 2.51 (1.68–3.74)           |                             |
| Other people deserve access to services more than PLHIV <sup>f</sup>    | Strongly agree    | 91/106 (85.8)                                              | 2.16 (1.36–3.41)           |                             | 19/106 (17.9)                                                                      | 1.83 (1.19–2.82)           |                             | 13/106 (12.3)                                                                          | 3.85 (1.40–10.62)          |                             | 87/106 (82.1)                                               | 2.36 (1.33–4.19)           |                             |
|                                                                         | Missing           | 25/27 (92.6)                                               |                            |                             | 4/27 (14.8)                                                                        |                            |                             | 3/27 (11.1)                                                                            |                            |                             | 19/27 (70.4)                                                |                            |                             |
|                                                                         | Strongly disagree | 387/490 (79.0)                                             | 1                          | 0.621                       | 24/490 (4.9)                                                                       | 1                          | <b>&lt;0.001</b>            | 17/490 (3.5)                                                                           | 1                          | <b>&lt;0.001</b>            | 357/490 (72.9)                                              | 1                          | 0.278                       |
|                                                                         | Disagree          | 442/570 (77.5)                                             | 0.91 (0.68–1.22)           |                             | 54/570 (9.5)                                                                       | 2.00 (1.18–3.41)           |                             | 38/570 (6.7)                                                                           | 1.93 (1.02–3.62)           |                             | 432/570 (75.8)                                              | 1.14 (0.86–1.51)           |                             |
| Prefer not to provide services to PLHIV <sup>g</sup>                    | Agree             | 182/229 (79.5)                                             | 1.02 (0.67–1.55)           |                             | 104/229 (45.4)                                                                     | 16.02 (10.93–23.48)        |                             | 47/229 (20.5)                                                                          | 6.98 (3.85–12.64)          |                             | 185/229 (80.8)                                              | 1.54 (0.93–2.54)           |                             |
|                                                                         | Strongly agree    | 61/82 (74.4)                                               | 0.77 (0.46–1.29)           |                             | 32/82 (39.0)                                                                       | 12.23 (6.78–22.06)         |                             | 9/82 (11.0)                                                                            | 3.34 (1.90–5.85)           |                             | 61/82 (74.4)                                                | 1.07 (0.56–2.04)           |                             |
|                                                                         | Missing           | 28/37 (75.7)                                               |                            |                             | 4/37 (10.8)                                                                        |                            |                             | 7/37 (18.9)                                                                            |                            |                             | 27/37 (73.0)                                                |                            |                             |
|                                                                         | Strongly disagree | 574/740 (77.6)                                             | 1                          | 0.798                       | 71/740 (9.6)                                                                       | 1                          | <b>&lt;0.001</b>            | 31/740 (4.2)                                                                           | 1                          | <b>&lt;0.001</b>            | 546/740 (73.8)                                              | 1                          | 0.283                       |
|                                                                         | Disagree          | 447/568 (78.7)                                             | 1.06 (0.88–1.28)           |                             | 105/568 (18.5)                                                                     | 2.10 (1.50–2.95)           |                             | 53/568 (9.3)                                                                           | 2.28 (1.27–4.11)           |                             | 441/568 (77.6)                                              | 1.21 (0.94–1.57)           |                             |
|                                                                         | Agree             | 43/53 (81.1)                                               | 1.22 (0.56–2.66)           |                             | 26/53 (49.1)                                                                       | 8.88 (5.46–14.44)          |                             | 23/53 (43.4)                                                                           | 16.84 (8.38–33.83)         |                             | 38/53 (71.7)                                                | 0.87 (0.42–1.81)           |                             |
|                                                                         | Strongly agree    | 30/39 (76.9)                                               | 0.94 (0.49–1.83)           |                             | 13/39 (33.3)                                                                       | 4.56 (2.21–9.39)           |                             | 8/39 (20.5)                                                                            | 5.65 (2.13–14.98)          |                             | 31/39 (79.5)                                                | 1.35 (0.76–2.39)           |                             |
|                                                                         | Missing           | 6/8 (75.0)                                                 |                            |                             | 3/8 (37.5)                                                                         |                            |                             | 3/8 (37.5)                                                                             |                            |                             | 6/8 (75.0)                                                  |                            |                             |

*(continued)*

SUPPLEMENTARY TABLE S3. (CONTINUED)

| Variable                                                                                                       | Categories        | <i>I would be ashamed if a woman in my family sold sex</i> |                            |                             | <i>Other people deserve access to health services more than women who sell sex</i> |                            |                             | <i>If I had a choice, I would prefer not to provide services to women who sell sex</i> |                            |                             | <i>Women who sell sex engage in irresponsible behaviors</i> |                            |                             |
|----------------------------------------------------------------------------------------------------------------|-------------------|------------------------------------------------------------|----------------------------|-----------------------------|------------------------------------------------------------------------------------|----------------------------|-----------------------------|----------------------------------------------------------------------------------------|----------------------------|-----------------------------|-------------------------------------------------------------|----------------------------|-----------------------------|
|                                                                                                                |                   | n/N (%) <sup>*</sup>                                       | aOR (95% CIs) <sup>†</sup> | p <sub>w</sub> <sup>‡</sup> | n/N (%) <sup>*</sup>                                                               | aOR (95% CIs) <sup>†</sup> | p <sub>w</sub> <sup>‡</sup> | n/N (%) <sup>*</sup>                                                                   | aOR (95% CIs) <sup>†</sup> | p <sub>w</sub> <sup>‡</sup> | n/N (%) <sup>*</sup>                                        | aOR (95% CIs) <sup>†</sup> | p <sub>w</sub> <sup>‡</sup> |
| I would be ashamed if a man in my family had sex with other men <sup>h</sup>                                   | Strongly disagree | 35/80 (43.8)                                               | 1                          | <0.001                      | 12/80 (15.0)                                                                       | 1                          | 0.426                       | 6/80 (7.5)                                                                             | 1                          | 0.603                       | 46/80 (57.5)                                                | 1                          | <0.001                      |
|                                                                                                                | Disagree          | 105/220 (47.7)                                             | 1.15 (0.69–1.94)           |                             | 26/220 (11.8)                                                                      | 0.77 (0.35–1.71)           |                             | 13/220 (5.9)                                                                           | 0.79 (0.27–2.29)           |                             | 110/220 (50.0)                                              | 0.73 (0.50–1.05)           |                             |
|                                                                                                                | Agree             | 464/557 (83.3)                                             | 6.40 (4.50–9.11)           |                             | 97/557 (17.4)                                                                      | 1.18 (0.63–2.18)           |                             | 50/557 (9.0)                                                                           | 1.18 (0.48–2.89)           |                             | 449/557 (80.6)                                              | 3.05 (2.04–4.57)           |                             |
|                                                                                                                | Strongly agree    | 489/539 (90.7)                                             | 12.62 (7.09–22.49)         |                             | 81/539 (15.0)                                                                      | 0.99 (0.55–1.78)           |                             | 49/539 (9.1)                                                                           | 1.22 (0.51–2.89)           |                             | 452/539 (83.9)                                              | 3.85 (2.28–6.50)           |                             |
|                                                                                                                | Missing           | 7/12 (58.3)                                                |                            |                             | 2/12 (16.7)                                                                        |                            |                             | 0/12 (0.0)                                                                             |                            |                             | 5/12 (41.7)                                                 |                            |                             |
| MSM engage in irresponsible behaviors <sup>i</sup>                                                             | Strongly disagree | 61/91 (67.0)                                               | 1                          | <0.001                      | 8/91 (8.8)                                                                         | 1                          | <0.001                      | 2/91 (2.2)                                                                             | 1                          | 0.089                       | 32/91 (35.2)                                                | 1                          | <0.001                      |
|                                                                                                                | Disagree          | 204/313 (65.2)                                             | 0.91 (0.42–1.97)           |                             | 38/313 (12.1)                                                                      | 1.47 (0.44–4.87)           |                             | 25/313 (8.0)                                                                           | 4.07 (0.78–21.38)          |                             | 154/313 (49.2)                                              | 1.73 (1.05–2.85)           |                             |
|                                                                                                                | Agree             | 539/647 (83.3)                                             | 2.44 (1.13–5.28)           |                             | 110/647 (17.0)                                                                     | 2.09 (0.75–5.82)           |                             | 52/647 (8.0)                                                                           | 3.81 (1.04–13.88)          |                             | 565/647 (87.3)                                              | 12.59 (8.14–19.48)         |                             |
|                                                                                                                | Strongly agree    | 259/302 (85.8)                                             | 2.97 (1.24–7.08)           |                             | 58/302 (19.2)                                                                      | 2.47 (0.95–6.42)           |                             | 34/302 (11.3)                                                                          | 5.65 (1.24–25.77)          |                             | 278/302 (92.1)                                              | 21.24 (12.30–36.65)        |                             |
|                                                                                                                | Missing           | 37/55 (67.3)                                               |                            |                             | 4/55 (7.3)                                                                         |                            |                             | 5/55 (9.1)                                                                             |                            |                             | 33/55 (60.0)                                                |                            |                             |
| Other people deserve access to services more than MSM <sup>j</sup>                                             | Strongly disagree | 340/445 (76.4)                                             | 1                          | 0.177                       | 14/445 (3.1)                                                                       | 1                          | <0.001                      | 6/445 (1.3)                                                                            | 1                          | <0.001                      | 314/445 (70.6)                                              | 1                          | 0.061                       |
|                                                                                                                | Disagree          | 561/720 (77.9)                                             | 1.08 (0.80–1.46)           |                             | 58/720 (8.1)                                                                       | 2.65 (1.22–5.75)           |                             | 53/720 (7.4)                                                                           | 5.69 (2.54–12.73)          |                             | 560/720 (77.8)                                              | 1.43 (1.09–1.88)           |                             |
|                                                                                                                | Agree             | 135/163 (82.8)                                             | 1.47 (1.00–2.14)           |                             | 104/163 (63.8)                                                                     | 54.16 (26.03–112.67)       |                             | 41/163 (25.2)                                                                          | 23.95 (10.19–56.30)        |                             | 127/163 (77.9)                                              | 1.44 (0.94–2.19)           |                             |
|                                                                                                                | Strongly agree    | 47/59 (79.7)                                               | 1.20 (0.50–2.88)           |                             | 37/59 (62.7)                                                                       | 51.61 (21.47–124.02)       |                             | 15/59 (25.4)                                                                           | 24.44 (10.26–58.21)        |                             | 46/59 (78.0)                                                | 1.44 (0.78–2.67)           |                             |
|                                                                                                                | Missing           | 17/21 (81.0)                                               |                            |                             | 5/21 (23.8)                                                                        |                            |                             | 3/21 (14.3)                                                                            |                            |                             | 15/21 (71.4)                                                |                            |                             |
| Prefer not to provide services to MSM <sup>k</sup>                                                             | Strongly disagree | 365/486 (75.1)                                             | 1                          | 0.008                       | 46/486 (9.5)                                                                       | 1                          | <0.001                      | 12/486 (2.5)                                                                           | 1                          | <0.001                      | 340/486 (70.0)                                              | 1                          | 0.008                       |
|                                                                                                                | Disagree          | 613/768 (79.8)                                             | 1.31 (0.98–1.74)           |                             | 106/768 (13.8)                                                                     | 1.50 (0.93–2.42)           |                             | 40/768 (5.2)                                                                           | 2.09 (0.91–4.82)           |                             | 605/768 (78.8)                                              | 1.57 (1.18–2.08)           |                             |
|                                                                                                                | Agree             | 77/90 (85.6)                                               | 1.93 (1.04–3.59)           |                             | 42/90 (46.7)                                                                       | 8.20 (5.21–12.92)          |                             | 44/90 (48.9)                                                                           | 36.90 (18.56–73.35)        |                             | 70/90 (77.8)                                                | 1.47 (0.75–2.90)           |                             |
|                                                                                                                | Strongly agree    | 34/48 (70.8)                                               | 0.79 (0.43–1.45)           |                             | 22/48 (45.8)                                                                       | 7.94 (4.24–14.90)          |                             | 21/48 (43.8)                                                                           | 30.41 (17.85–51.81)        |                             | 39/48 (81.3)                                                | 1.84 (0.70–4.88)           |                             |
|                                                                                                                | Missing           | 11/16 (68.8)                                               |                            |                             | 2/16 (12.5)                                                                        |                            |                             | 1/16 (6.3)                                                                             |                            |                             | 8/16 (50.0)                                                 |                            |                             |
| I would be ashamed if a young woman in my family became pregnant before marriage <sup>l</sup>                  | Strongly disagree | 146/239 (61.1)                                             | 1                          | <0.001                      | 19/239 (7.9)                                                                       | 1                          | 0.017                       | 15/239 (6.3)                                                                           | 1                          | 0.039                       | 150/239 (62.8)                                              | 1                          | <0.001                      |
|                                                                                                                | Disagree          | 372/508 (73.2)                                             | 1.75 (1.28–2.41)           |                             | 75/508 (14.8)                                                                      | 2.03 (1.10–3.78)           |                             | 34/508 (6.7)                                                                           | 1.08 (0.54–2.20)           |                             | 361/508 (71.1)                                              | 1.45 (1.00–2.09)           |                             |
|                                                                                                                | Agree             | 400/450 (88.9)                                             | 5.17 (3.65–7.32)           |                             | 83/450 (18.4)                                                                      | 2.61 (1.35–5.05)           |                             | 47/450 (10.4)                                                                          | 1.72 (1.04–2.86)           |                             | 381/450 (84.7)                                              | 3.26 (2.03–5.23)           |                             |
|                                                                                                                | Strongly agree    | 166/191 (86.9)                                             | 4.28 (2.70–6.78)           |                             | 38/191 (19.9)                                                                      | 2.85 (1.39–5.84)           |                             | 20/191 (10.5)                                                                          | 1.71 (0.83–3.52)           |                             | 153/191 (80.1)                                              | 2.38 (1.28–4.41)           |                             |
|                                                                                                                | Missing           | 16/20 (80.0)                                               |                            |                             | 3/20 (15.0)                                                                        |                            |                             | 2/20 (10.0)                                                                            |                            |                             | 17/20 (85.0)                                                |                            |                             |
| Young women who become pregnant before marriage engage in irresponsible behaviors <sup>m</sup>                 | Strongly disagree | 101/156 (64.7)                                             | 1                          | <0.001                      | 15/156 (9.6)                                                                       | 1                          | <0.001                      | 8/156 (5.1)                                                                            | 1                          | 0.001                       | 82/156 (52.6)                                               | 1                          | <0.001                      |
|                                                                                                                | Disagree          | 415/574 (72.3)                                             | 1.43 (0.82–2.49)           |                             | 68/574 (11.8)                                                                      | 1.27 (0.64–2.56)           |                             | 35/574 (6.1)                                                                           | 1.23 (0.55–2.73)           |                             | 382/574 (66.6)                                              | 1.80 (1.20–2.69)           |                             |
|                                                                                                                | Agree             | 467/543 (86.0)                                             | 3.40 (1.92–6.02)           |                             | 101/543 (18.6)                                                                     | 2.16 (1.09–4.27)           |                             | 62/543 (11.4)                                                                          | 2.42 (1.25–4.66)           |                             | 479/543 (88.2)                                              | 6.80 (4.47–10.33)          |                             |
|                                                                                                                | Strongly agree    | 102/118 (86.4)                                             | 3.55 (1.63–7.72)           |                             | 30/118 (25.4)                                                                      | 3.24 (1.59–6.64)           |                             | 11/118 (9.3)                                                                           | 1.94 (0.93–4.05)           |                             | 106/118 (89.8)                                              | 8.19 (4.12–16.27)          |                             |
|                                                                                                                | Missing           | 15/17 (88.2)                                               |                            |                             | 4/17 (23.5)                                                                        |                            |                             | 2/17 (11.8)                                                                            |                            |                             | 13/17 (76.5)                                                |                            |                             |
| Other people deserve access to services more than young women who become pregnant before marriage <sup>n</sup> | Strongly disagree | 372/476 (78.2)                                             | 1                          | 0.045                       | 14/476 (2.9)                                                                       | 1                          | <0.001                      | 16/476 (3.4)                                                                           | 1                          | <0.001                      | 334/476 (70.2)                                              | 1                          | 0.016                       |
|                                                                                                                | Disagree          | 521/676 (77.1)                                             | 0.94 (0.66–1.33)           |                             | 57/676 (8.4)                                                                       | 3.03 (1.75–5.28)           |                             | 42/676 (6.2)                                                                           | 1.86 (1.02–3.38)           |                             | 530/676 (78.4)                                              | 1.53 (1.11–2.09)           |                             |
|                                                                                                                | Agree             | 155/182 (85.2)                                             | 1.60 (0.99–2.58)           |                             | 109/182 (59.9)                                                                     | 49.53 (24.49–100.18)       |                             | 41/182 (22.5)                                                                          | 8.08 (3.99–16.38)          |                             | 142/182 (78.0)                                              | 1.48 (1.00–2.17)           |                             |
|                                                                                                                | Strongly agree    | 39/57 (68.4)                                               | 0.60 (0.37–0.97)           |                             | 33/57 (57.9)                                                                       | 45.24 (21.33–95.94)        |                             | 15/57 (26.3)                                                                           | 9.88 (5.65–17.29)          |                             | 43/57 (75.4)                                                | 1.27 (0.67–2.43)           |                             |
|                                                                                                                | Missing           | 13/17 (76.5)                                               |                            |                             | 5/17 (29.4)                                                                        |                            |                             | 4/17 (23.5)                                                                            |                            |                             | 13/17 (76.5)                                                |                            |                             |

(continued)

SUPPLEMENTARY TABLE S3. (CONTINUED)

| Variable                                                                                       | Categories        | <i>I would be ashamed if a woman in my family sold sex</i> |                            |                             | <i>Other people deserve access to health services more than women who sell sex</i> |                            |                             | <i>If I had a choice, I would prefer not to provide services to women who sell sex</i> |                            |                             | <i>Women who sell sex engage in irresponsible behaviors</i> |                            |                             |
|------------------------------------------------------------------------------------------------|-------------------|------------------------------------------------------------|----------------------------|-----------------------------|------------------------------------------------------------------------------------|----------------------------|-----------------------------|----------------------------------------------------------------------------------------|----------------------------|-----------------------------|-------------------------------------------------------------|----------------------------|-----------------------------|
|                                                                                                |                   | n/N (%) <sup>*</sup>                                       | aOR (95% CIs) <sup>†</sup> | p <sub>w</sub> <sup>‡</sup> | n/N (%) <sup>*</sup>                                                               | aOR (95% CIs) <sup>†</sup> | p <sub>w</sub> <sup>‡</sup> | n/N (%) <sup>*</sup>                                                                   | aOR (95% CIs) <sup>†</sup> | p <sub>w</sub> <sup>‡</sup> | n/N (%) <sup>*</sup>                                        | aOR (95% CIs) <sup>†</sup> | p <sub>w</sub> <sup>‡</sup> |
| Prefer not to provide services to young women who become pregnant before marriage <sup>o</sup> | Strongly disagree | 492/624 (78.8)                                             | 1                          | 0.427                       | 59/624 (9.5)                                                                       | 1                          | <b>&lt;0.001</b>            | 20/624 (3.2)                                                                           | 1                          | <b>&lt;0.001</b>            | 458/624 (73.4)                                              | 1                          | 0.516                       |
|                                                                                                | Disagree          | 544/701 (77.6)                                             | 0.92 (0.69–1.24)           |                             | 116/701 (16.5)                                                                     | 1.87 (1.36–2.58)           |                             | 62/701 (8.8)                                                                           | 2.85 (1.48–5.48)           |                             | 540/701 (77.0)                                              | 1.20 (0.92–1.55)           |                             |
|                                                                                                | Agree             | 42/52 (80.8)                                               | 1.10 (0.52–2.32)           |                             | 30/52 (57.7)                                                                       | 12.76 (8.62–18.88)         |                             | 25/52 (48.1)                                                                           | 26.65 (10.10–70.31)        |                             | 40/52 (76.9)                                                | 1.16 (0.61–2.19)           |                             |
|                                                                                                | Strongly agree    | 19/27 (70.4)                                               | 0.62 (0.32–1.20)           |                             | 11/27 (40.7)                                                                       | 6.39 (3.03–13.48)          |                             | 10/27 (37.0)                                                                           | 17.03 (6.42–45.14)         |                             | 22/27 (81.5)                                                | 1.59 (0.50–5.08)           |                             |
|                                                                                                | Missing           | 3/4 (75.0)                                                 |                            |                             | 2/4 (50.0)                                                                         | 7.21 (3.60–14.47)          |                             | 1/4 (25.0)                                                                             |                            |                             | 2/4 (50.0)                                                  |                            |                             |

\*Proportion of health workers responding strongly agree or agree.

<sup>†</sup>The aOR for sex is adjusted for age group; the aOR for age group is adjusted for sex; the aOR for all other predictor variables is adjusted for sex and age group.

<sup>‡</sup>A *p* value of <0.05 indicates that the predictor creates a statistically significant improvement in the fit of the model.

<sup>a</sup>Infection control and universal precautions (including postexposure prophylaxis and waste management).

<sup>b</sup>My coworkers sometimes treat people living with HIV poorly when providing them.

<sup>c</sup>My coworkers sometimes talk badly about people thought to be living with HIV.

<sup>d</sup>I would be ashamed if a woman in my family was PLHIV.

<sup>e</sup>PLHIV engage in irresponsible behaviors.

<sup>f</sup>Other people deserve access to health services more than PLHIV.

<sup>g</sup>If I had a choice, I would prefer not to provide services to PLHIV.

<sup>h</sup>I would be ashamed if a man in my family was MSM.

<sup>i</sup>MSM engage in irresponsible behaviors.

<sup>j</sup>Other people deserve access to health services more than MSM.

<sup>k</sup>If I had a choice, I would prefer not to provide services to MSM.

<sup>l</sup>I would be ashamed if a young woman in my family became pregnant before marriage.

<sup>m</sup>YW engage in irresponsible behaviors.

<sup>n</sup>Other people deserve access to health services more than YW.

<sup>o</sup>If I had a choice, I would prefer not to provide services to YW.

aOR, adjusted odds ratio; CIs, confidence intervals; MSM, men who have sex with men; *n*, number of individuals experiencing the three types of stigma within groups; *N*, total number of individuals within groups; PLHIV, people living with HIV; *p<sub>w</sub>*, *p* value of the Wald test; YW, young women who become pregnant before marriage.

*p*-Values marked in bold indicate numbers that are significant on the 95% confidence limit.
