# Supplementary material
Source: PubMed Central journal article supplement (PMC6983735)
Supplement: Supp_Table4.pdf [file Supp_Table4.pdf]

SUPPLEMENTARY TABLE S4. THE ASSOCIATION BETWEEN SOCIODEMOGRAPHIC CHARACTERISTICS OF HEALTH WORKERS WITH FOUR STIGMA OUTCOMES FOR MEN WHO HAVE SEX WITH MEN

| Variable       | Categories                 | <i>I would be ashamed if someone in my family was a man who has sex with men</i> |                            |                             | <i>Other people deserve access to health services more than MSM</i> |                            |                             | <i>If I had a choice, I would prefer not to provide services to MSM</i> |                            |                             | <i>MSM engage in irresponsible behaviors</i> |                            |                             |
|----------------|----------------------------|----------------------------------------------------------------------------------|----------------------------|-----------------------------|---------------------------------------------------------------------|----------------------------|-----------------------------|-------------------------------------------------------------------------|----------------------------|-----------------------------|----------------------------------------------|----------------------------|-----------------------------|
|                |                            | n/N (%) <sup>*</sup>                                                             | aOR (95% CIs) <sup>†</sup> | p <sub>w</sub> <sup>‡</sup> | n/N (%) <sup>*</sup>                                                | aOR (95% CIs) <sup>†</sup> | p <sub>w</sub> <sup>‡</sup> | n/N (%) <sup>*</sup>                                                    | aOR (95% CIs) <sup>†</sup> | p <sub>w</sub> <sup>‡</sup> | n/N (%) <sup>*</sup>                         | aOR (95% CIs) <sup>†</sup> | p <sub>w</sub> <sup>‡</sup> |
| Sex            | Male                       | 302/373 (81.0)                                                                   | 1                          | 0.163                       | 66/373 (17.7)                                                       | 1                          | 0.262                       | 42/373 (11.3)                                                           | 1                          | 0.379                       | 266/373 (71.3)                               | 1                          | 0.419                       |
|                | Female                     | 763/993 (76.8)                                                                   | 0.74 (0.49–1.13)           |                             | 156/993 (15.7)                                                      | 0.85 (0.64–1.13)           |                             | 99/993 (10.0)                                                           | 0.86 (0.61–1.20)           |                             | 684/993 (68.9)                               | 0.84 (0.54–1.29)           |                             |
| Age            | <25 years                  | 86/112 (76.8)                                                                    | 1                          | <b>&lt;0.001</b>            | 22/112 (19.6)                                                       | 1                          | 0.067                       | 14/112 (12.5)                                                           | 1                          | 0.097                       | 75/112 (67.0)                                | 1                          | <b>0.001</b>                |
|                | 25–34 years                | 346/466 (74.2)                                                                   | 0.86 (0.43–1.69)           |                             | 69/466 (14.8)                                                       | 0.70 (0.45–1.09)           |                             | 46/466 (9.9)                                                            | 0.76 (0.45–1.29)           |                             | 294/466 (63.1)                               | 0.83 (0.58–1.20)           |                             |
|                | 35–44 years                | 273/353 (77.3)                                                                   | 1.04 (0.45–2.43)           |                             | 50/353 (14.2)                                                       | 0.68 (0.43–1.06)           |                             | 27/353 (7.6)                                                            | 0.58 (0.24–1.39)           |                             | 247/353 (70.0)                               | 1.16 (0.81–1.66)           |                             |
|                | >44 year                   | 360/435 (82.8)                                                                   | 1.47 (0.71–3.07)           |                             | 81/435 (18.6)                                                       | 0.94 (0.60–1.48)           |                             | 54/435 (12.4)                                                           | 1.00 (0.60–1.67)           |                             | 334/435 (76.8)                               | 1.65 (1.09–2.49)           |                             |
| Education      | Did not complete secondary | 55/64 (85.9)                                                                     | 1                          | <b>&lt;0.001</b>            | 13/64 (20.3)                                                        | 1                          | <b>&lt;0.001</b>            | 12/64 (18.8)                                                            | 1                          | <b>&lt;0.001</b>            | 42/64 (65.6)                                 | 1                          | <b>&lt;0.001</b>            |
|                | Completed secondary        | 447/615 (72.7)                                                                   | 0.54 (0.25–1.17)           |                             | 128/615 (20.8)                                                      | 1.03 (0.59–1.82)           |                             | 80/615 (13.0)                                                           | 0.63 (0.37–1.07)           |                             | 398/615 (64.7)                               | 1.33 (0.63–2.80)           |                             |
|                | Further                    | 563/687 (82.0)                                                                   | 1.01 (0.44–2.32)           |                             | 81/687 (11.8)                                                       | 0.52 (0.32–0.84)           |                             | 49/687 (7.1)                                                            | 0.32 (0.17–0.58)           |                             | 510/687 (74.2)                               | 2.41 (1.28–4.55)           |                             |
| Marital status | Married                    | 585/720 (81.3)                                                                   | 1                          | <b>0.018</b>                | 122/720 (16.9)                                                      | 1                          | 0.230                       | 78/720 (10.8)                                                           | 1                          | 0.278                       | 523/720 (72.6)                               | 1                          | 0.166                       |
|                | Not married                | 480/646 (74.3)                                                                   | 0.69 (0.51–0.94)           |                             | 100/646 (15.5)                                                      | 0.87 (0.69–1.09)           |                             | 63/646 (9.8)                                                            | 0.84 (0.61–1.15)           |                             | 427/646 (66.1)                               | 0.79 (0.57–1.10)           |                             |
| Religion       | Very important             | 955/1187 (80.5)                                                                  | 1                          | <b>0.029</b>                | 200/1187 (16.8)                                                     | 1                          | 0.205                       | 121/1187 (10.2)                                                         | 1                          | 0.053                       | 838/1187 (70.6)                              | 1                          | 0.740                       |
|                | Important                  | 90/146 (61.6)                                                                    | 0.60 (0.40–0.90)           |                             | 16/146 (11.0)                                                       | 0.62 (0.36–1.08)           |                             | 16/146 (11.0)                                                           | 1.19 (0.67–2.12)           |                             | 94/146 (64.4)                                | 1.12 (0.75–1.66)           |                             |
|                | Somewhat important         | 9/15 (60.0)                                                                      | 0.76 (0.25–2.30)           |                             | 4/15 (26.7)                                                         | 2.03 (0.62–6.64)           |                             | 4/15 (26.7)                                                             | 4.35 (1.30–14.52)          |                             | 8/15 (53.3)                                  | 0.76 (0.25–2.31)           |                             |
|                | Not important              | 8/15 (53.3)                                                                      | 0.35 (0.11–1.11)           |                             | 2/15 (13.3)                                                         | 0.71 (0.15–3.23)           |                             | 0/15 (0.0)                                                              | -                          |                             | 8/15 (53.3)                                  | 0.63 (0.21–1.91)           |                             |
| Ever tested    | Missing                    | 3/3 (100.0)                                                                      |                            |                             | 0/3 (0.0)                                                           |                            |                             | 0/3 (0.0)                                                               |                            |                             | 2/3 (66.7)                                   |                            |                             |
|                | No                         | 20/24 (83.3)                                                                     | 1                          | 0.482                       | 4/24 (16.7)                                                         | 1                          | 0.986                       | 4/24 (16.7)                                                             | 1                          | 0.296                       | 23/24 (95.8)                                 | 1                          | <b>0.031</b>                |
|                | Yes                        | 1036/1333 (77.7)                                                                 | 0.74 (0.32–1.71)           |                             | 218/1333 (16.4)                                                     | 1.01 (0.28–3.62)           |                             | 136/1333 (10.2)                                                         | 0.58 (0.21–1.61)           |                             | 919/1333 (68.9)                              | 0.10 (0.01–0.81)           |                             |
| HIV status     | Missing                    | 9/9 (100.0)                                                                      |                            |                             | 0/9 (0.0)                                                           |                            |                             | 1/9 (11.1)                                                              |                            |                             | 8/9 (88.9)                                   |                            |                             |
|                | Negative                   | 766/978 (78.3)                                                                   | 1                          | 0.231                       | 157/978 (16.1)                                                      | 1                          | 0.828                       | 105/978 (10.7)                                                          | 1                          | 0.106                       | 682/978 (69.7)                               | 1                          | 0.084                       |
|                | Positive                   | 189/246 (76.8)                                                                   | 0.84 (0.63–1.12)           |                             | 42/246 (17.1)                                                       | 1.04 (0.72–1.51)           |                             | 19/246 (7.7)                                                            | 0.69 (0.44–1.08)           |                             | 164/246 (66.7)                               | 0.77 (0.58–1.03)           |                             |
|                | Undetermined               | 6/9 (66.7)                                                                       |                            |                             | 2/9 (22.2)                                                          |                            |                             | 1/9 (11.1)                                                              |                            |                             | 6/9 (66.7)                                   |                            |                             |
|                | Missing                    | 104/133 (78.2)                                                                   |                            |                             | 21/133 (15.8)                                                       |                            |                             | 16/133 (12.0)                                                           |                            |                             | 98/133 (73.7)                                |                            |                             |

\*Proportion of health workers responding strongly agree or agree.

†The aOR for sex is adjusted for age group; the aOR for age group is adjusted for sex; the aOR for all other predictor variables is adjusted for sex and age group.

‡A p value of <0.05 indicates that the predictor creates a statistically significant improvement in the fit of the model.

aOR, adjusted odds ratio; CIs, confidence intervals; MSM, men who have sex with men; n, number of individuals experiencing the three types of stigma within groups; N, total number of individuals within groups; p<sub>w</sub>, p value of the Wald test.

p-Values marked in bold indicate numbers that are significant on the 95% confidence limit.
