# Supplementary material
Source: PubMed Central journal article supplement (PMC6983735)
Supplement: Supp_Table5.pdf [file Supp_Table5.pdf]

SUPPLEMENTARY TABLE S5. THE ASSOCIATION BETWEEN HEALTH WORKER TRAINING, PERCEPTIONS OF COWORKER ATTITUDES, AND STIGMATIZING ATTITUDES WITH FOUR STIGMA OUTCOMES FOR MEN WHO HAVE SEX WITH MEN

| Variable                                                                | Categories        | <i>I would be ashamed if a man in my family had sex with other men</i> |                            |                             | <i>Other people deserve access to health services more than MSM</i> |                            |                             | <i>If I had a choice, I would prefer not to provide services to MSM</i> |                            |                             | <i>MSM engage in irresponsible behaviors</i> |                            |                             |
|-------------------------------------------------------------------------|-------------------|------------------------------------------------------------------------|----------------------------|-----------------------------|---------------------------------------------------------------------|----------------------------|-----------------------------|-------------------------------------------------------------------------|----------------------------|-----------------------------|----------------------------------------------|----------------------------|-----------------------------|
|                                                                         |                   | n/N (%) <sup>*</sup>                                                   | aOR (95% CIs) <sup>†</sup> | p <sub>w</sub> <sup>‡</sup> | n/N (%) <sup>*</sup>                                                | aOR (95% CIs) <sup>†</sup> | p <sub>w</sub> <sup>‡</sup> | n/N (%) <sup>*</sup>                                                    | aOR (95% CIs) <sup>†</sup> | p <sub>w</sub> <sup>‡</sup> | n/N (%) <sup>*</sup>                         | aOR (95% CIs) <sup>†</sup> | p <sub>w</sub> <sup>‡</sup> |
| Training on infection control <sup>a</sup>                              | No                | 243/318 (76.4)                                                         | 1                          | 0.349                       | 41/318 (12.9)                                                       | 1                          | 0.077                       | 30/318 (9.4)                                                            | 1                          | 0.725                       | 218/318 (68.6)                               | 1                          | 0.821                       |
|                                                                         | Yes               | 773/977 (79.1)                                                         | 1.13 (0.87–1.47)           |                             | 164/977 (16.8)                                                      | 1.34 (0.97–1.85)           |                             | 99/977 (10.1)                                                           | 1.06 (0.75–1.50)           |                             | 683/977 (69.9)                               | 1.03 (0.81–1.30)           |                             |
|                                                                         | Missing           | 49/71 (69.0)                                                           |                            |                             | 17/71 (23.9)                                                        |                            |                             | 12/71 (16.9)                                                            |                            |                             | 49/71 (69.0)                                 |                            |                             |
| My coworkers sometimes treat people living with HIV poorly <sup>b</sup> | Strongly disagree | 386/510 (75.7)                                                         | 1                          | 0.065                       | 55/510 (10.8)                                                       | 1                          | <0.001                      | 27/510 (5.3)                                                            | 1                          | <0.001                      | 326/510 (63.9)                               | 1                          | 0.007                       |
|                                                                         | Disagree          | 481/623 (77.2)                                                         | 1.07 (0.70–1.65)           |                             | 100/623 (16.1)                                                      | 1.58 (1.09–2.27)           |                             | 60/623 (9.6)                                                            | 1.92 (1.23–2.98)           |                             | 439/623 (70.5)                               | 1.33 (1.02–1.74)           |                             |
|                                                                         | Agree             | 143/167 (85.6)                                                         | 1.85 (1.09–3.14)           |                             | 53/167 (31.7)                                                       | 3.88 (2.61–5.78)           |                             | 40/167 (24.0)                                                           | 5.84 (3.33–10.27)          |                             | 137/167 (82.0)                               | 2.56 (1.50–4.38)           |                             |
| My coworkers sometimes talk badly about PLHIV <sup>c</sup>              | Strongly agree    | 28/35 (80.0)                                                           | 1.15 (0.45–2.97)           |                             | 12/35 (34.3)                                                        | 4.32 (1.76–10.62)          |                             | 9/35 (25.7)                                                             | 6.32 (2.81–14.20)          |                             | 27/35 (77.1)                                 | 1.76 (0.65–4.76)           |                             |
|                                                                         | Disagree          | 27/31 (87.1)                                                           |                            | 0.008                       | 2/31 (6.5)                                                          |                            | <0.001                      | 5/31 (16.1)                                                             |                            | <0.001                      | 21/31 (67.7)                                 |                            | <0.001                      |
|                                                                         | Agree             | 205/281 (73.0)                                                         | 1                          |                             | 34/281 (12.1)                                                       | 1                          |                             | 24/281 (8.5)                                                            | 1                          |                             | 156/281 (55.5)                               | 1                          |                             |
| I would be ashamed if someone in my family had HIV <sup>d</sup>         | Strongly disagree | 479/630 (76.0)                                                         | 1.15 (0.72–1.84)           |                             | 84/630 (13.3)                                                       | 1.14 (0.75–1.72)           |                             | 47/630 (7.5)                                                            | 0.88 (0.57–1.38)           |                             | 438/630 (69.5)                               | 1.80 (1.42–2.27)           |                             |
|                                                                         | Disagree          | 274/327 (83.8)                                                         | 1.85 (1.20–2.87)           |                             | 70/327 (21.4)                                                       | 2.00 (1.41–2.84)           |                             | 48/327 (14.7)                                                           | 1.87 (1.11–3.17)           |                             | 258/327 (78.9)                               | 2.93 (2.07–4.15)           |                             |
|                                                                         | Agree             | 92/108 (85.2)                                                          | 2.04 (1.09–3.82)           |                             | 31/108 (28.7)                                                       | 2.98 (1.87–4.77)           |                             | 18/108 (16.7)                                                           | 2.21 (1.28–3.80)           |                             | 85/108 (78.7)                                | 2.85 (1.77–4.58)           |                             |
| PLHIV engage in irresponsible behaviors <sup>e</sup>                    | Strongly agree    | 15/20 (75.0)                                                           |                            | 0.235                       | 3/20 (15.0)                                                         |                            | <0.001                      | 4/20 (20.0)                                                             |                            | <0.001                      | 13/20 (65.0)                                 |                            | 0.482                       |
|                                                                         | Disagree          | 528/685 (77.1)                                                         | 1                          |                             | 81/685 (11.8)                                                       | 1                          |                             | 45/685 (6.6)                                                            | 1                          |                             | 462/685 (67.4)                               | 1                          |                             |
|                                                                         | Agree             | 466/593 (78.6)                                                         | 1.08 (0.78–1.48)           |                             | 106/593 (17.9)                                                      | 1.62 (1.21–2.16)           |                             | 60/593 (10.1)                                                           | 1.61 (1.08–2.38)           |                             | 424/593 (71.5)                               | 1.19 (0.90–1.57)           |                             |
| Other people deserve access to services more than PLHIV <sup>f</sup>    | Strongly agree    | 35/39 (89.7)                                                           | 2.53 (0.64–9.99)           |                             | 17/39 (43.6)                                                        | 5.72 (2.82–11.63)          |                             | 21/39 (53.8)                                                            | 17.42 (7.34–41.35)         |                             | 30/39 (76.9)                                 | 1.58 (0.78–3.21)           |                             |
|                                                                         | Disagree          | 29/40 (72.5)                                                           | 0.71 (0.30–1.67)           |                             | 15/40 (37.5)                                                        | 4.23 (2.06–8.69)           |                             | 10/40 (25.0)                                                            | 4.33 (2.07–9.06)           |                             | 28/40 (70.0)                                 | 1.02 (0.47–2.20)           |                             |
|                                                                         | Agree             | 7/9 (77.8)                                                             |                            | 0.118                       | 3/9 (33.3)                                                          |                            | <0.001                      | 5/9 (55.6)                                                              |                            | 0.007                       | 6/9 (66.7)                                   |                            | 0.002                       |
| Prefer not to provide services to PLHIV <sup>g</sup>                    | Strongly disagree | 251/339 (74.0)                                                         | 1                          |                             | 30/339 (8.8)                                                        | 1                          |                             | 18/339 (5.3)                                                            | 1                          |                             | 205/339 (60.5)                               | 1                          |                             |
|                                                                         | Disagree          | 474/607 (78.1)                                                         | 1.22 (0.77–1.92)           |                             | 103/607 (17.0)                                                      | 2.12 (1.33–3.36)           |                             | 65/607 (10.7)                                                           | 2.16 (1.05–4.44)           |                             | 424/607 (69.9)                               | 1.49 (0.96–2.31)           |                             |
|                                                                         | Agree             | 228/292 (78.1)                                                         | 1.14 (0.70–1.87)           |                             | 58/292 (19.9)                                                       | 2.48 (1.78–3.45)           |                             | 38/292 (13.0)                                                           | 2.59 (1.45–4.66)           |                             | 222/292 (76.0)                               | 1.95 (1.24–3.07)           |                             |
| Prefer not to provide services to PLHIV <sup>g</sup>                    | Strongly agree    | 92/104 (88.5)                                                          | 2.32 (1.17–4.60)           |                             | 25/104 (24.0)                                                       | 3.11 (1.82–5.32)           |                             | 14/104 (13.5)                                                           | 2.63 (1.12–6.15)           |                             | 84/104 (80.8)                                | 2.48 (1.51–4.09)           |                             |
|                                                                         | Disagree          | 20/24 (83.3)                                                           |                            | 0.249                       | 6/24 (25.0)                                                         |                            | <0.001                      | 6/24 (25.0)                                                             |                            | <0.001                      | 15/24 (62.5)                                 |                            | 0.051                       |
|                                                                         | Agree             | 385/478 (80.5)                                                         | 1                          |                             | 32/478 (6.7)                                                        | 1                          |                             | 32/478 (6.7)                                                            | 1                          |                             | 336/478 (70.3)                               | 1                          |                             |
| Prefer not to provide services to PLHIV <sup>g</sup>                    | Strongly disagree | 424/558 (76.0)                                                         | 0.75 (0.53–1.06)           |                             | 53/558 (9.5)                                                        | 1.46 (0.85–2.51)           |                             | 38/558 (6.8)                                                            | 1.02 (0.53–1.95)           |                             | 373/558 (66.8)                               | 0.82 (0.59–1.15)           |                             |
|                                                                         | Disagree          | 172/224 (76.8)                                                         | 0.79 (0.48–1.29)           |                             | 99/224 (44.2)                                                       | 10.96 (6.57–18.29)         |                             | 51/224 (22.8)                                                           | 4.07 (2.52–6.55)           |                             | 169/224 (75.4)                               | 1.27 (0.85–1.92)           |                             |
|                                                                         | Agree             | 61/76 (80.3)                                                           | 0.93 (0.58–1.50)           |                             | 31/76 (40.8)                                                        | 9.48 (4.65–19.31)          |                             | 13/76 (17.1)                                                            | 2.84 (1.44–5.60)           |                             | 53/76 (69.7)                                 | 0.91 (0.62–1.35)           |                             |
| Prefer not to provide services to PLHIV <sup>g</sup>                    | Strongly agree    | 23/30 (76.7)                                                           |                            | 0.525                       | 7/30 (23.3)                                                         |                            | <0.001                      | 7/30 (23.3)                                                             |                            | <0.001                      | 19/30 (63.3)                                 |                            | 0.906                       |
|                                                                         | Disagree          | 556/714 (77.9)                                                         | 1                          |                             | 82/714 (11.5)                                                       | 1                          |                             | 49/714 (6.9)                                                            | 1                          |                             | 491/714 (68.8)                               | 1                          |                             |
|                                                                         | Agree             | 431/555 (77.7)                                                         | 0.97 (0.69–1.37)           |                             | 104/555 (18.7)                                                      | 1.78 (1.30–2.43)           |                             | 56/555 (10.1)                                                           | 1.53 (0.99–2.37)           |                             | 391/555 (70.5)                               | 1.05 (0.83–1.31)           |                             |
| Prefer not to provide services to PLHIV <sup>g</sup>                    | Strongly disagree | 44/51 (86.3)                                                           | 1.76 (0.59–5.27)           |                             | 21/51 (41.2)                                                        | 5.28 (3.60–7.75)           |                             | 24/51 (47.1)                                                            | 12.04 (7.03–20.64)         |                             | 37/51 (72.5)                                 | 1.17 (0.50–2.75)           |                             |
|                                                                         | Disagree          | 27/38 (71.1)                                                           | 0.61 (0.27–1.34)           |                             | 13/38 (34.2)                                                        | 3.89 (1.88–8.04)           |                             | 10/38 (26.3)                                                            | 4.69 (2.10–10.46)          |                             | 26/38 (68.4)                                 | 0.84 (0.47–1.50)           |                             |
|                                                                         | Agree             | 7/8 (87.5)                                                             |                            |                             | 2/8 (25.0)                                                          |                            |                             | 2/8 (25.0)                                                              |                            |                             | 5/8 (62.5)                                   |                            |                             |

(continued)

SUPPLEMENTARY TABLE S5. (CONTINUED)

| Variable                                                                                      | Categories        | <i>I would be ashamed if a man in my family had sex with other men</i> |                            |                             | <i>Other people deserve access to health services more than MSM</i> |                            |                             | <i>If I had a choice, I would prefer not to provide services to MSM</i> |                            |                             | <i>MSM engage in irresponsible behaviors</i> |                            |                             |
|-----------------------------------------------------------------------------------------------|-------------------|------------------------------------------------------------------------|----------------------------|-----------------------------|---------------------------------------------------------------------|----------------------------|-----------------------------|-------------------------------------------------------------------------|----------------------------|-----------------------------|----------------------------------------------|----------------------------|-----------------------------|
|                                                                                               |                   | n/N (%)*                                                               | aOR (95% CIs) <sup>†</sup> | p <sub>w</sub> <sup>‡</sup> | n/N (%)*                                                            | aOR (95% CIs) <sup>†</sup> | p <sub>w</sub> <sup>‡</sup> | n/N (%)*                                                                | aOR (95% CIs) <sup>†</sup> | p <sub>w</sub> <sup>‡</sup> | n/N (%)*                                     | aOR (95% CIs) <sup>†</sup> | p <sub>w</sub> <sup>‡</sup> |
| I would be ashamed if a woman in my family sold sex <sup>h</sup>                              | Strongly disagree | 39/75 (52.0)                                                           | 1                          | <0.001                      | 6/75 (8.0)                                                          | 1                          | 0.271                       | 8/75 (10.7)                                                             | 1                          | 0.909                       | 41/75 (54.7)                                 | 1                          | <0.001                      |
|                                                                                               | Disagree          | 93/212 (43.9)                                                          | 0.72 (0.37–1.40)           |                             | 34/212 (16.0)                                                       | 2.26 (0.85–6.00)           |                             | 19/212 (9.0)                                                            | 0.86 (0.48–1.55)           |                             | 107/212 (50.5)                               | 0.83 (0.51–1.37)           |                             |
|                                                                                               | Agree             | 513/610 (84.1)                                                         | 4.97 (2.83–8.74)           |                             | 102/610 (16.7)                                                      | 2.33 (0.97–5.59)           |                             | 66/610 (10.8)                                                           | 1.04 (0.50–2.16)           |                             | 447/610 (73.3)                               | 2.26 (1.42–3.60)           |                             |
|                                                                                               | Strongly agree    | 414/457 (90.6)                                                         | 9.11 (4.55–18.23)          |                             | 80/457 (17.5)                                                       | 2.49 (0.99–6.24)           |                             | 48/457 (10.5)                                                           | 1.01 (0.52–1.97)           |                             | 348/457 (76.1)                               | 2.64 (1.40–5.01)           |                             |
|                                                                                               | Missing           | 6/12 (50.0)                                                            |                            |                             | 0/12 (0.0)                                                          |                            |                             | 0/12 (0.0)                                                              |                            |                             | 7/12 (58.3)                                  |                            |                             |
| Women who sell sex engage in irresponsible behaviors <sup>i</sup>                             | Strongly disagree | 52/81 (64.2)                                                           | 1                          | <0.001                      | 10/81 (12.3)                                                        | 1                          | 0.381                       | 2/81 (2.5)                                                              | 1                          | 0.041                       | 23/81 (28.4)                                 | 1                          | <0.001                      |
|                                                                                               | Disagree          | 127/234 (54.3)                                                         | 0.68 (0.34–1.34)           |                             | 37/234 (15.8)                                                       | 1.32 (0.56–3.14)           |                             | 26/234 (11.1)                                                           | 4.96 (0.97–25.31)          |                             | 79/234 (33.8)                                | 1.37 (0.67–2.82)           |                             |
|                                                                                               | Agree             | 604/716 (84.4)                                                         | 3.04 (1.42–6.50)           |                             | 125/716 (17.5)                                                      | 1.48 (0.76–2.87)           |                             | 65/716 (9.1)                                                            | 3.94 (1.03–15.00)          |                             | 573/716 (80.0)                               | 10.74 (5.43–21.26)         |                             |
|                                                                                               | Strongly agree    | 270/311 (86.8)                                                         | 3.81 (1.58–9.19)           |                             | 48/311 (15.4)                                                       | 1.29 (0.65–2.53)           |                             | 46/311 (14.8)                                                           | 6.90 (1.51–31.42)          |                             | 269/311 (86.5)                               | 18.07 (10.05–32.50)        |                             |
|                                                                                               | Missing           | 12/24 (50.0)                                                           |                            |                             | 2/24 (8.3)                                                          |                            |                             | 2/24 (8.3)                                                              |                            |                             | 6/24 (25.0)                                  |                            |                             |
| Other people deserve access to services more than women who sell sex <sup>l</sup>             | Strongly disagree | 326/423 (77.1)                                                         | 1                          | 0.378                       | 16/423 (3.8)                                                        | 1                          | <0.001                      | 20/423 (4.7)                                                            | 1                          | <0.001                      | 278/423 (65.7)                               | 1                          | <0.001                      |
|                                                                                               | Disagree          | 556/723 (76.9)                                                         | 0.98 (0.78–1.22)           |                             | 66/723 (9.1)                                                        | 2.58 (1.57–4.25)           |                             | 54/723 (7.5)                                                            | 1.65 (0.83–3.28)           |                             | 500/723 (69.2)                               | 1.15 (0.85–1.55)           |                             |
|                                                                                               | Agree             | 139/166 (83.7)                                                         | 1.46 (0.87–2.46)           |                             | 111/166 (66.9)                                                      | 52.03 (30.71–88.16)        |                             | 51/166 (30.7)                                                           | 8.95 (5.06–15.86)          |                             | 129/166 (77.7)                               | 1.72 (1.21–2.45)           |                             |
|                                                                                               | Strongly agree    | 36/45 (80.0)                                                           | 1.20 (0.53–2.71)           |                             | 28/45 (62.2)                                                        | 43.66 (17.44–109.32)       |                             | 14/45 (31.1)                                                            | 9.52 (5.13–17.68)          |                             | 37/45 (82.2)                                 | 2.44 (1.50–3.97)           |                             |
|                                                                                               | Missing           | 8/9 (88.9)                                                             |                            |                             | 1/9 (11.1)                                                          |                            |                             | 2/9 (22.2)                                                              |                            |                             | 6/9 (66.7)                                   |                            |                             |
| Prefer not to provide services to women who sell sex <sup>k</sup>                             | Strongly disagree | 391/514 (76.1)                                                         | 1                          | 0.536                       | 51/514 (9.9)                                                        | 1                          | <0.001                      | 22/514 (4.3)                                                            | 1                          | <0.001                      | 338/514 (65.8)                               | 1                          | 0.142                       |
|                                                                                               | Disagree          | 574/733 (78.3)                                                         | 1.13 (0.78–1.63)           |                             | 114/733 (15.6)                                                      | 1.69 (1.16–2.47)           |                             | 53/733 (7.2)                                                            | 1.80 (1.11–2.90)           |                             | 521/733 (71.1)                               | 1.26 (0.94–1.68)           |                             |
|                                                                                               | Agree             | 71/84 (84.5)                                                           | 1.67 (0.84–3.34)           |                             | 42/84 (50.0)                                                        | 9.14 (5.36–15.57)          |                             | 45/84 (53.6)                                                            | 27.06 (14.75–49.65)        |                             | 61/84 (72.6)                                 | 1.32 (0.78–2.26)           |                             |
|                                                                                               | Strongly agree    | 24/29 (82.8)                                                           | 1.41 (0.47–4.28)           |                             | 13/29 (44.8)                                                        | 7.11 (3.29–15.40)          |                             | 18/29 (62.1)                                                            | 35.97 (14.89–86.88)        |                             | 25/29 (86.2)                                 | 3.02 (0.90–10.09)          |                             |
|                                                                                               | Missing           | 5/6 (83.3)                                                             |                            |                             | 2/6 (33.3)                                                          |                            |                             | 3/6 (50.0)                                                              |                            |                             | 5/6 (83.3)                                   |                            |                             |
| I would be ashamed if a young woman in my family became pregnant before marriage <sup>l</sup> | Strongly disagree | 163/229 (71.2)                                                         | 1                          | <0.001                      | 28/229 (12.2)                                                       | 1                          | <0.001                      | 16/229 (7.0)                                                            | 1                          | 0.005                       | 130/229 (56.8)                               | 1                          | <0.001                      |
|                                                                                               | Disagree          | 342/493 (69.4)                                                         | 0.93 (0.68–1.26)           |                             | 62/493 (12.6)                                                       | 1.05 (0.68–1.63)           |                             | 36/493 (7.3)                                                            | 1.08 (0.58–2.02)           |                             | 315/493 (63.9)                               | 1.37 (0.92–2.06)           |                             |
|                                                                                               | Agree             | 386/439 (87.9)                                                         | 2.90 (1.77–4.74)           |                             | 93/439 (21.2)                                                       | 1.94 (1.37–2.73)           |                             | 60/439 (13.7)                                                           | 2.14 (1.24–3.71)           |                             | 350/439 (79.7)                               | 2.94 (1.85–4.68)           |                             |
|                                                                                               | Strongly agree    | 160/188 (85.1)                                                         | 2.24 (1.28–3.92)           |                             | 36/188 (19.1)                                                       | 1.69 (1.05–2.73)           |                             | 26/188 (13.8)                                                           | 2.15 (1.14–4.07)           |                             | 143/188 (76.1)                               | 2.34 (1.45–3.78)           |                             |
|                                                                                               | Missing           | 14/17 (82.4)                                                           |                            |                             | 3/17 (17.6)                                                         |                            |                             | 3/17 (17.6)                                                             |                            |                             | 12/17 (70.6)                                 |                            |                             |

(continued)

SUPPLEMENTARY TABLE S5. (CONTINUED)

| Variable                                                                                                       | Categories        | <i>I would be ashamed if a man in my family had sex with other men</i> |                            |                             | <i>Other people deserve access to health services more than MSM</i> |                            |                             | <i>If I had a choice, I would prefer not to provide services to MSM</i> |                            |                             | <i>MSM engage in irresponsible behaviors</i> |                            |                             |
|----------------------------------------------------------------------------------------------------------------|-------------------|------------------------------------------------------------------------|----------------------------|-----------------------------|---------------------------------------------------------------------|----------------------------|-----------------------------|-------------------------------------------------------------------------|----------------------------|-----------------------------|----------------------------------------------|----------------------------|-----------------------------|
|                                                                                                                |                   | n/N (%) <sup>*</sup>                                                   | aOR (95% CIs) <sup>†</sup> | p <sub>w</sub> <sup>‡</sup> | n/N (%) <sup>*</sup>                                                | aOR (95% CIs) <sup>†</sup> | p <sub>w</sub> <sup>‡</sup> | n/N (%) <sup>*</sup>                                                    | aOR (95% CIs) <sup>†</sup> | p <sub>w</sub> <sup>‡</sup> | n/N (%) <sup>*</sup>                         | aOR (95% CIs) <sup>†</sup> | p <sub>w</sub> <sup>‡</sup> |
| Young women who become pregnant before marriage engage in irresponsible behaviors <sup>m</sup>                 | Strongly disagree | 104/144 (72.2)                                                         | 1                          | <b>&lt;0.001</b>            | 12/144 (8.3)                                                        | 1                          | <b>&lt;0.001</b>            | 5/144 (3.5)                                                             | 1                          | <b>&lt;0.001</b>            | 71/144 (49.3)                                | 1                          | <b>&lt;0.001</b>            |
|                                                                                                                | Disagree          | 379/554 (68.4)                                                         | 0.87 (0.53–1.41)           |                             | 71/554 (12.8)                                                       | 1.67 (0.85–3.29)           |                             | 48/554 (8.7)                                                            | 2.76 (1.09–7.02)           |                             | 332/554 (59.9)                               | 1.63 (1.03–2.56)           |                             |
|                                                                                                                | Agree             | 468/537 (87.2)                                                         | 2.66 (1.66–4.25)           |                             | 102/537 (19.0)                                                      | 2.67 (1.32–5.39)           |                             | 69/537 (12.8)                                                           | 4.32 (1.87–9.98)           |                             | 438/537 (81.6)                               | 4.72 (2.87–7.75)           |                             |
|                                                                                                                | Strongly agree    | 102/116 (87.9)                                                         | 2.81 (1.38–5.70)           |                             | 35/116 (30.2)                                                       | 4.92 (2.35–10.29)          |                             | 16/116 (13.8)                                                           | 4.60 (1.68–12.64)          |                             | 103/116 (88.8)                               | 8.29 (4.50–15.26)          |                             |
|                                                                                                                | Missing           | 12/15 (80.0)                                                           |                            |                             | 2/15 (13.3)                                                         |                            |                             | 3/15 (20.0)                                                             |                            |                             | 6/15 (40.0)                                  |                            |                             |
| Other people deserve access to services more than young women who become pregnant before marriage <sup>n</sup> | Strongly disagree | 360/453 (79.5)                                                         | 1                          | 0.335                       | 20/453 (4.4)                                                        | 1                          | <b>&lt;0.001</b>            | 31/453 (6.8)                                                            | 1                          | <b>&lt;0.001</b>            | 303/453 (66.9)                               | 1                          | 0.501                       |
|                                                                                                                | Disagree          | 507/667 (76.0)                                                         | 0.81 (0.59–1.12)           |                             | 54/667 (8.1)                                                        | 1.93 (1.34–2.78)           |                             | 42/667 (6.3)                                                            | 0.92 (0.68–1.26)           |                             | 468/667 (70.2)                               | 1.15 (0.84–1.58)           |                             |
|                                                                                                                | Agree             | 143/176 (81.3)                                                         | 1.11 (0.69–1.77)           |                             | 115/176 (65.3)                                                      | 43.24 (25.13–74.40)        |                             | 48/176 (27.3)                                                           | 5.27 (3.21–8.65)           |                             | 127/176 (72.2)                               | 1.25 (0.80–1.97)           |                             |
|                                                                                                                | Strongly agree    | 43/54 (79.6)                                                           | 0.94 (0.41–2.14)           |                             | 26/54 (48.1)                                                        | 20.02 (9.92–40.42)         |                             | 15/54 (27.8)                                                            | 5.22 (2.55–10.68)          |                             | 41/54 (75.9)                                 | 1.46 (0.84–2.54)           |                             |
|                                                                                                                | Missing           | 12/16 (75.0)                                                           |                            |                             | 7/16 (43.8)                                                         |                            |                             | 5/16 (31.3)                                                             |                            |                             | 11/16 (68.8)                                 |                            |                             |
| Prefer not to provide services to young women who become pregnant before marriage <sup>o</sup>                 | Strongly disagree | 465/602 (77.2)                                                         | 1                          | 0.436                       | 66/602 (11.0)                                                       | 1                          | <b>&lt;0.001</b>            | 30/602 (5.0)                                                            | 1                          | <b>&lt;0.001</b>            | 410/602 (68.1)                               | 1                          | 0.884                       |
|                                                                                                                | Disagree          | 535/685 (78.1)                                                         | 1.03 (0.77–1.38)           |                             | 117/685 (17.1)                                                      | 1.67 (1.28–2.18)           |                             | 68/685 (9.9)                                                            | 2.15 (1.51–3.05)           |                             | 485/685 (70.8)                               | 1.10 (0.87–1.40)           |                             |
|                                                                                                                | Agree             | 43/50 (86.0)                                                           | 1.76 (0.80–3.90)           |                             | 26/50 (52.0)                                                        | 8.72 (4.72–16.12)          |                             | 32/50 (64.0)                                                            | 36.07 (19.54–66.60)        |                             | 35/50 (70.0)                                 | 1.05 (0.58–1.88)           |                             |
|                                                                                                                | Strongly agree    | 19/25 (76.0)                                                           | 0.88 (0.25–3.08)           |                             | 11/25 (44.0)                                                        | 6.17 (2.38–15.97)          |                             | 9/25 (36.0)                                                             | 10.30 (4.27–24.85)         |                             | 18/25 (72.0)                                 | 1.13 (0.58–2.22)           |                             |
|                                                                                                                | Missing           | 3/4 (75.0)                                                             |                            |                             | 2/4 (50.0)                                                          |                            |                             | 2/4 (50.0)                                                              |                            |                             | 2/4 (50.0)                                   |                            |                             |

\*Proportion of health workers responding strongly agree or agree.

<sup>†</sup>The aOR for sex is adjusted for age group; the aOR for age group is adjusted for sex; the aOR for all other predictor variables is adjusted for sex and age group.

<sup>‡</sup>A *p* value of <0.05 indicates that the predictor creates a statistically significant improvement in the fit of the model.

<sup>§</sup>Infection control and universal precautions (including postexposure prophylaxis and waste management).

<sup>||</sup>My coworkers sometimes treat people living with HIV poorly when providing them.

<sup>¶</sup>My coworkers sometimes talk badly about people thought to be living with HIV.

<sup>Ⓛ</sup>I would be ashamed is a woman in my family was PLHIV.

<sup>Ⓜ</sup>PLHIV engage in irresponsible behaviors.

<sup>Ⓝ</sup>Other people deserve access to health services more than PLHIV.

<sup>Ⓟ</sup>If I had a choice, I would prefer not to provide services to PLHIV.

<sup>Ⓡ</sup>I would be ashamed if a woman in my family was a woman who sells sex.

<sup>Ⓢ</sup>Women who sell sex engage in irresponsible behaviors.

<sup>Ⓣ</sup>Other people deserve access to health services more than women who sell sex.

<sup>Ⓤ</sup>If I had a choice, I would prefer not to provide services to women who sell sex.

<sup>Ⓥ</sup>I would be ashamed if a young woman in my family became pregnant before marriage.

<sup>Ⓦ</sup>Young women who become pregnant before marriage engage in irresponsible behaviors.

<sup>Ⓧ</sup>Other people deserve access to health services more than young women who become pregnant before marriage.

<sup>Ⓨ</sup>If I had a choice, I would prefer not to provide services to young women who become pregnant before marriage.

aOR, adjusted odds ratio; CIs, confidence intervals; MSM, men who have sex with men; *n*, number of individuals reporting the four types of stigma within groups; *N*, total number of individuals within groups; PLHIV, people living with HIV; *p<sub>w</sub>*, *p* value of the Wald test.

*p*-Values marked in bold indicate numbers that are significant on the 95% confidence limit.
