# Supplementary material
Source: PubMed Central journal article supplement (PMC6983735)
Supplement: Supp_Table6.pdf [file Supp_Table6.pdf]

**SUPPLEMENTARY TABLE S6. THE ASSOCIATION BETWEEN SOCIODEMOGRAPHIC CHARACTERISTICS OF HEALTH WORKERS WITH FOUR STIGMA OUTCOMES FOR YOUNG WOMEN WHO BECOME PREGNANT BEFORE MARRIAGE**

| Variable       | Categories                 | <i>I would be ashamed if a young woman in my family became pregnant before marriage</i> |                            |                             | <i>Other people deserve access to health services more than young women who become pregnant before marriage</i> |                            |                             | <i>If I had a choice, I would prefer not to provide services to young women who become pregnant before marriage</i> |                            |                             | <i>Young women who become pregnant before marriage engage in irresponsible behaviors</i> |                            |                             |
|----------------|----------------------------|-----------------------------------------------------------------------------------------|----------------------------|-----------------------------|-----------------------------------------------------------------------------------------------------------------|----------------------------|-----------------------------|---------------------------------------------------------------------------------------------------------------------|----------------------------|-----------------------------|------------------------------------------------------------------------------------------|----------------------------|-----------------------------|
|                |                            | n/N (%)*                                                                                | aOR (95% CIs) <sup>†</sup> | p <sub>w</sub> <sup>‡</sup> | n/N (%)*                                                                                                        | aOR (95% CIs) <sup>†</sup> | p <sub>w</sub> <sup>‡</sup> | n/N (%)*                                                                                                            | aOR (95% CIs) <sup>†</sup> | p <sub>w</sub> <sup>‡</sup> | n/N (%)*                                                                                 | aOR (95% CIs) <sup>†</sup> | p <sub>w</sub> <sup>‡</sup> |
| Sex            | Male                       | 188/386 (48.7)                                                                          | 1                          | 0.148                       | 69/386 (17.9)                                                                                                   | 1                          | 0.307                       | 24/386 (6.2)                                                                                                        | 1                          | 0.316                       | 198/386 (51.3)                                                                           | 1                          | <b>0.003</b>                |
|                | Female                     | 465/1046 (44.5)                                                                         | 0.81 (0.62–1.08)           |                             | 174/1046 (16.6)                                                                                                 | 0.89 (0.71–1.11)           |                             | 53/1046 (5.1)                                                                                                       | 0.77 (0.46–1.29)           |                             | 475/1046 (45.4)                                                                          | 0.76 (0.64–0.91)           |                             |
| Age            | <25 years                  | 43/118 (36.4)                                                                           | 1                          | <b>&lt;0.001</b>            | 25/118 (21.2)                                                                                                   | 1                          | <b>0.009</b>                | 10/118 (8.5)                                                                                                        | 1                          | 0.273                       | 43/118 (36.4)                                                                            | 1                          | <b>0.047</b>                |
|                | 25–34 years                | 200/490 (40.8)                                                                          | 1.19 (0.83–1.69)           |                             | 68/490 (13.9)                                                                                                   | 0.59 (0.37–0.96)           |                             | 18/490 (3.7)                                                                                                        | 0.40 (0.13–1.27)           |                             | 208/490 (42.4)                                                                           | 1.26 (0.88–1.82)           |                             |
|                | 35–44 years                | 179/374 (47.9)                                                                          | 1.60 (1.09–2.36)           |                             | 72/374 (19.3)                                                                                                   | 0.89 (0.49–1.62)           |                             | 21/374 (5.6)                                                                                                        | 0.64 (0.26–1.60)           |                             | 194/374 (51.9)                                                                           | 1.89 (1.14–3.12)           |                             |
|                | >44 year                   | 231/450 (51.3)                                                                          | 1.85 (1.23–2.78)           |                             | 78/450 (17.3)                                                                                                   | 0.78 (0.42–1.46)           |                             | 28/450 (6.2)                                                                                                        | 0.72 (0.29–1.81)           |                             | 228/450 (50.7)                                                                           | 1.81 (1.11–2.94)           |                             |
| Education      | Did not complete secondary | 30/69 (43.5)                                                                            | 1                          | 0.140                       | 11/69 (15.9)                                                                                                    | 1                          | <b>&lt;0.001</b>            | 6/69 (8.7)                                                                                                          | 1                          | <b>0.019</b>                | 31/69 (44.9)                                                                             | 1                          | 0.600                       |
|                | Completed secondary        | 318/646 (49.2)                                                                          | 1.45 (0.90–2.34)           |                             | 146/646 (22.6)                                                                                                  | 1.50 (0.70–3.18)           |                             | 47/646 (7.3)                                                                                                        | 0.81 (0.22–2.96)           |                             | 311/646 (48.1)                                                                           | 1.28 (0.73–2.25)           |                             |
|                | Further                    | 305/717 (42.5)                                                                          | 1.18 (0.73–1.93)           |                             | 86/717 (12.0)                                                                                                   | 0.70 (0.36–1.36)           |                             | 24/717 (3.3)                                                                                                        | 0.36 (0.11–1.25)           |                             | 331/717 (46.2)                                                                           | 1.25 (0.81–1.92)           |                             |
| Marital status | Married                    | 363/752 (48.3)                                                                          | 1                          | 0.315                       | 124/752 (16.5)                                                                                                  | 1                          | 0.562                       | 41/752 (5.5)                                                                                                        | 1                          | 0.913                       | 375/752 (49.9)                                                                           | 1                          | 0.505                       |
|                | Not married                | 290/680 (42.6)                                                                          | 0.90 (0.73–1.11)           |                             | 119/680 (17.5)                                                                                                  | 1.11 (0.78–1.59)           |                             | 36/680 (5.3)                                                                                                        | 0.97 (0.55–1.71)           |                             | 298/680 (43.8)                                                                           | 0.90 (0.67–1.22)           |                             |
| Religion       | Very important             | 586/1239 (47.3)                                                                         | 1                          | 0.227                       | 212/1239 (17.1)                                                                                                 | 1                          | 0.368                       | 64/1239 (5.2)                                                                                                       | 1                          | 0.370                       | 595/1239 (48.0)                                                                          | 1                          | 0.674                       |
|                | Important                  | 57/160 (35.6)                                                                           | 0.80 (0.56–1.15)           |                             | 26/160 (16.3)                                                                                                   | 0.96 (0.61–1.52)           |                             | 9/160 (5.6)                                                                                                         | 0.97 (0.46–2.04)           |                             | 65/160 (40.6)                                                                            | 0.90 (0.63–1.28)           |                             |
|                | Somewhat important         | 6/17 (35.3)                                                                             | 0.87 (0.30–2.49)           |                             | 5/17 (29.4)                                                                                                     | 2.15 (0.73–6.33)           |                             | 3/17 (17.6)                                                                                                         | 3.34 (0.86–13.02)          |                             | 5/17 (29.4)                                                                              | 0.55 (0.18–1.65)           |                             |
|                | Not important              | 3/14 (21.4)                                                                             | 0.32 (0.09–1.18)           |                             | 0/14 (0.0)                                                                                                      | 1.00 (1.00–1.00)           |                             | 1/14 (7.1)                                                                                                          | 0.81 (0.10–6.60)           |                             | 7/14 (50.0)                                                                              | 1.18 (0.40–3.48)           |                             |
|                | Missing                    | 1/2 (50.0)                                                                              |                            |                             | 0/2 (0.0)                                                                                                       |                            |                             | 0/2 (0.0)                                                                                                           |                            |                             | 1/2 (50.0)                                                                               |                            |                             |
| Ever tested    | No                         | 18/30 (60.0)                                                                            | 1                          | 0.094                       | 9/30 (30.0)                                                                                                     | 1                          | 0.052                       | 5/30 (16.7)                                                                                                         | 1                          | <b>0.003</b>                | 16/30 (53.3)                                                                             | 1                          | 0.527                       |
|                | Yes                        | 631/1395 (45.2)                                                                         | 0.59 (0.32–1.09)           |                             | 234/1395 (16.8)                                                                                                 | 0.49 (0.23–1.01)           |                             | 72/1395 (5.2)                                                                                                       | 0.29 (0.13–0.65)           |                             | 653/1395 (46.8)                                                                          | 0.82 (0.45–1.51)           |                             |
|                | Missing                    | 4/7 (57.1)                                                                              |                            |                             | 0/7 (0.0)                                                                                                       |                            |                             | 0/7 (0.0)                                                                                                           |                            |                             | 4/7 (57.1)                                                                               |                            |                             |
| HIV status     | Negative                   | 454/1026 (44.2)                                                                         | 1                          | 0.391                       | 163/1026 (15.9)                                                                                                 | 1                          | 0.440                       | 55/1026 (5.4)                                                                                                       | 1                          | <b>0.038</b>                | 483/1026 (47.1)                                                                          | 1                          | 0.318                       |
|                | Positive                   | 127/254 (50.0)                                                                          | 1.13 (0.85–1.49)           |                             | 47/254 (18.5)                                                                                                   | 1.14 (0.82–1.57)           |                             | 8/254 (3.1)                                                                                                         | 0.54 (0.31–0.97)           |                             | 119/254 (46.9)                                                                           | 0.87 (0.67–1.14)           |                             |
|                | Undetermined               | 4/8 (50.0)                                                                              |                            |                             | 1/8 (12.5)                                                                                                      |                            |                             | 0/8 (0.0)                                                                                                           |                            |                             | 4/8 (50.0)                                                                               |                            |                             |
|                | Missing                    | 68/144 (47.2)                                                                           |                            |                             | 32/144 (22.2)                                                                                                   |                            |                             | 14/144 (9.7)                                                                                                        |                            |                             | 67/144 (46.5)                                                                            |                            |                             |

\*Proportion of health workers responding strongly agree or agree.

<sup>†</sup>The aOR for sex is adjusted for age group; the aOR for age group is adjusted for sex; the aOR for all other predictor variables is adjusted for sex and age group.

<sup>‡</sup>A *p* value of <0.05 indicates that the predictor creates a statistically significant improvement in the fit of the model.

aOR, adjusted odds ratio; CIs, confidence intervals; *n*, number of individuals experiencing the three types of stigma within groups; *N*, total number of individuals within groups; *p<sub>w</sub>*, *p* value of the Wald test. *p*-Values marked in bold indicate numbers that are significant on the 95% confidence limit.
