# Supplementary material
Source: PubMed Central journal article supplement (PMC6983735)
Supplement: Supp_Table7.pdf [file Supp_Table7.pdf]

SUPPLEMENTARY TABLE S7. THE ASSOCIATION BETWEEN HEALTH WORKERS' TRAINING, PERCEPTIONS OF COWORKER ATTITUDES, AND STIGMATIZING ATTITUDES WITH FOUR STIGMA OUTCOMES FOR YOUNG WOMEN WHO BECOME PREGNANT BEFORE MARRIAGE

| Variable                                                                | Categories        | <i>I would be ashamed if a young woman in my family became pregnant before marriage</i> |                            |                             | <i>Other people deserve access to health services more than young women who become pregnant before marriage</i> |                            |                             | <i>If I had a choice, I would prefer not to provide services to young women who become pregnant before marriage</i> |                            |                             | <i>Young women who become pregnant before marriage engage in irresponsible behaviors</i> |                            |                             |
|-------------------------------------------------------------------------|-------------------|-----------------------------------------------------------------------------------------|----------------------------|-----------------------------|-----------------------------------------------------------------------------------------------------------------|----------------------------|-----------------------------|---------------------------------------------------------------------------------------------------------------------|----------------------------|-----------------------------|------------------------------------------------------------------------------------------|----------------------------|-----------------------------|
|                                                                         |                   | n/N (%) <sup>*</sup>                                                                    | aOR (95% CIs) <sup>†</sup> | p <sub>w</sub> <sup>‡</sup> | n/N (%) <sup>*</sup>                                                                                            | aOR (95% CIs) <sup>†</sup> | p <sub>w</sub> <sup>‡</sup> | n/N (%) <sup>*</sup>                                                                                                | aOR (95% CIs) <sup>†</sup> | p <sub>w</sub> <sup>‡</sup> | n/N (%) <sup>*</sup>                                                                     | aOR (95% CIs) <sup>†</sup> | p <sub>w</sub> <sup>‡</sup> |
| Training on infection control <sup>a</sup>                              | No                | 158/342 (46.2)                                                                          | 1                          | 0.635                       | 53/342 (15.5)                                                                                                   | 1                          | 0.616                       | 16/342 (4.7)                                                                                                        | 1                          | 0.726                       | 167/342 (48.8)                                                                           | 1                          | 0.340                       |
|                                                                         | Yes               | 458/1011 (45.3)                                                                         | 0.93 (0.70–1.24)           |                             | 172/1011 (17.0)                                                                                                 | 1.08 (0.79–1.47)           |                             | 55/1011 (5.4)                                                                                                       | 1.11 (0.62–2.00)           |                             | 473/1011 (46.8)                                                                          | 0.89 (0.71–1.13)           |                             |
|                                                                         | Missing           | 37/79 (46.8)                                                                            |                            |                             | 18/79 (22.8)                                                                                                    |                            |                             | 6/79 (7.6)                                                                                                          |                            |                             | 33/79 (41.8)                                                                             |                            |                             |
| My coworkers sometimes treat people living with HIV poorly <sup>b</sup> | Strongly disagree | 207/539 (38.4)                                                                          | 1                          | <0.001                      | 64/539 (11.9)                                                                                                   | 1                          | <0.001                      | 17/539 (3.2)                                                                                                        | 1                          | <0.001                      | 197/539 (36.5)                                                                           |                            | <0.001                      |
|                                                                         | Disagree          | 302/659 (45.8)                                                                          | 1.34 (1.06–1.70)           |                             | 108/659 (16.4)                                                                                                  | 1.43 (1.02–2.01)           |                             | 30/659 (4.6)                                                                                                        | 1.43 (0.79–2.58)           |                             | 336/659 (51.0)                                                                           | 1.79 (1.42–2.26)           |                             |
|                                                                         | Agree             | 108/171 (63.2)                                                                          | 2.70 (2.02–3.61)           |                             | 55/171 (32.2)                                                                                                   | 3.44 (2.32–5.11)           |                             | 20/171 (11.7)                                                                                                       | 3.93 (2.11–7.32)           |                             | 102/171 (59.6)                                                                           | 2.48 (1.70–3.61)           |                             |
|                                                                         | Strongly agree    | 19/35 (54.3)                                                                            | 1.75 (0.79–3.87)           |                             | 12/35 (34.3)                                                                                                    | 3.82 (2.15–6.79)           |                             | 6/35 (17.1)                                                                                                         | 6.17 (3.08–12.36)          |                             | 23/35 (65.7)                                                                             | 3.04 (1.43–6.45)           |                             |
| My coworkers sometimes talk badly about PLHIV <sup>c</sup>              | Missing           | 17/28 (60.7)                                                                            |                            |                             | 4/28 (14.3)                                                                                                     |                            |                             | 4/28 (14.3)                                                                                                         |                            |                             | 15/28 (53.6)                                                                             |                            |                             |
|                                                                         | Strongly disagree | 104/295 (35.3)                                                                          | 1                          | <0.001                      | 32/295 (10.8)                                                                                                   | 1                          | <0.001                      | 8/295 (2.7)                                                                                                         | 1                          | <0.001                      | 100/295 (33.9)                                                                           | 1                          | <0.001                      |
|                                                                         | Disagree          | 297/668 (44.5)                                                                          | 1.41 (1.06–1.86)           |                             | 90/668 (13.5)                                                                                                   | 1.27 (0.85–1.91)           |                             | 24/668 (3.6)                                                                                                        | 1.36 (0.90–2.05)           |                             | 299/668 (44.8)                                                                           | 1.50 (1.13–2.00)           |                             |
|                                                                         | Agree             | 180/337 (53.4)                                                                          | 2.01 (1.56–2.59)           |                             | 86/337 (25.5)                                                                                                   | 2.77 (2.00–3.84)           |                             | 32/337 (9.5)                                                                                                        | 3.73 (2.00–6.96)           |                             | 189/337 (56.1)                                                                           | 2.36 (1.64–3.41)           |                             |
| I would be ashamed if someone in my family had HIV <sup>d</sup>         | Strongly agree    | 67/112 (59.8)                                                                           | 2.56 (1.58–4.15)           |                             | 29/112 (25.9)                                                                                                   | 2.81 (1.73–4.57)           |                             | 13/112 (11.6)                                                                                                       | 4.68 (2.61–8.39)           |                             | 77/112 (68.8)                                                                            | 4.01 (2.78–5.79)           |                             |
|                                                                         | Missing           | 5/20 (25.0)                                                                             |                            |                             | 6/20 (30.0)                                                                                                     |                            |                             | 0/20 (0.0)                                                                                                          |                            |                             | 8/20 (40.0)                                                                              |                            |                             |
|                                                                         | Strongly disagree | 278/718 (38.7)                                                                          | 1                          | <0.001                      | 92/718 (12.8)                                                                                                   | 1                          | <0.001                      | 20/718 (2.8)                                                                                                        | 1                          | <0.001                      | 295/718 (41.1)                                                                           | 1                          | <0.001                      |
|                                                                         | Disagree          | 307/629 (48.8)                                                                          | 1.49 (1.24–1.79)           |                             | 115/629 (18.3)                                                                                                  | 1.50 (1.14–1.96)           |                             | 30/629 (4.8)                                                                                                        | 1.70 (1.16–2.51)           |                             | 327/629 (52.0)                                                                           | 1.54 (1.26–1.88)           |                             |
|                                                                         | Agree             | 33/40 (82.5)                                                                            | 7.38 (3.68–14.80)          |                             | 17/40 (42.5)                                                                                                    | 4.81 (2.76–8.39)           |                             | 14/40 (35.0)                                                                                                        | 18.04 (9.63–33.80)         |                             | 26/40 (65.0)                                                                             | 2.57 (1.23–5.38)           |                             |
| PLHIV engage in irresponsible behaviors <sup>e</sup>                    | Strongly agree    | 30/38 (78.9)                                                                            | 5.82 (2.82–12.02)          |                             | 18/38 (47.4)                                                                                                    | 6.20 (2.81–13.70)          |                             | 12/38 (31.6)                                                                                                        | 15.56 (7.51–32.23)         |                             | 22/38 (57.9)                                                                             | 1.98 (0.87–4.55)           |                             |
|                                                                         | Missing           | 5/7 (71.4)                                                                              |                            |                             | 1/7 (14.3)                                                                                                      |                            |                             | 1/7 (14.3)                                                                                                          |                            |                             | 3/7 (42.9)                                                                               |                            |                             |
|                                                                         | Strongly disagree | 147/355 (41.4)                                                                          | 1                          | <0.001                      | 43/355 (12.1)                                                                                                   | 1                          | <0.001                      | 11/355 (3.1)                                                                                                        | 1                          | <0.001                      | 114/355 (32.1)                                                                           | 1                          | <0.001                      |
|                                                                         | Disagree          | 263/650 (40.5)                                                                          | 0.93 (0.70–1.24)           |                             | 92/650 (14.2)                                                                                                   | 1.20 (0.77–1.87)           |                             | 24/650 (3.7)                                                                                                        | 1.20 (0.70–2.07)           |                             | 304/650 (46.8)                                                                           | 1.81 (1.32–2.49)           |                             |
|                                                                         | Agree             | 173/306 (56.5)                                                                          | 1.74 (1.19–2.55)           |                             | 79/306 (25.8)                                                                                                   | 2.49 (1.79–3.48)           |                             | 31/306 (10.1)                                                                                                       | 3.39 (1.84–6.25)           |                             | 183/306 (59.8)                                                                           | 3.02 (2.25–4.06)           |                             |
| Other people deserve access to services more than PLHIV <sup>f</sup>    | Strongly agree    | 63/105 (60.0)                                                                           | 1.93 (1.32–2.83)           |                             | 26/105 (24.8)                                                                                                   | 2.39 (1.36–4.21)           |                             | 11/105 (10.5)                                                                                                       | 3.53 (1.47–8.51)           |                             | 65/105 (61.9)                                                                            | 3.22 (1.95–5.29)           |                             |
|                                                                         | Missing           | 7/16 (43.8)                                                                             |                            |                             | 3/16 (18.8)                                                                                                     |                            |                             | 0/16 (0.0)                                                                                                          |                            |                             | 7/16 (43.8)                                                                              |                            |                             |
|                                                                         | Strongly disagree | 194/501 (38.7)                                                                          | 1                          | <0.001                      | 21/501 (4.2)                                                                                                    | 1                          | <0.001                      | 7/501 (1.4)                                                                                                         | 1                          | <0.001                      | 200/501 (39.9)                                                                           | 1                          | <0.001                      |
|                                                                         | Disagree          | 271/589 (46.0)                                                                          | 1.33 (1.06–1.67)           |                             | 67/589 (11.4)                                                                                                   | 2.87 (1.74–4.72)           |                             | 23/589 (3.9)                                                                                                        | 2.77 (0.98–7.82)           |                             | 281/589 (47.7)                                                                           | 1.36 (1.02–1.80)           |                             |
| Prefer not to provide services to PLHIV <sup>g</sup>                    | Agree             | 134/232 (57.8)                                                                          | 2.18 (1.56–3.05)           |                             | 110/232 (47.4)                                                                                                  | 20.35 (11.75–35.24)        |                             | 34/232 (14.7)                                                                                                       | 11.70 (4.79–28.62)         |                             | 139/232 (59.9)                                                                           | 2.28 (1.62–3.22)           |                             |
|                                                                         | Strongly agree    | 41/78 (52.6)                                                                            | 1.68 (1.20–2.37)           |                             | 37/78 (47.4)                                                                                                    | 20.22 (10.56–38.72)        |                             | 10/78 (12.8)                                                                                                        | 9.80 (3.34–28.81)          |                             | 38/78 (48.7)                                                                             | 1.37 (0.88–2.15)           |                             |
|                                                                         | Missing           | 13/32 (40.6)                                                                            |                            |                             | 8/32 (25.0)                                                                                                     |                            |                             | 3/32 (9.4)                                                                                                          |                            |                             | 15/32 (46.9)                                                                             |                            |                             |
|                                                                         | Strongly disagree | 326/751 (43.4)                                                                          | 1                          | 0.004                       | 87/751 (11.6)                                                                                                   | 1                          | <0.001                      | 13/751 (1.7)                                                                                                        | 1                          | <0.001                      | 311/751 (41.4)                                                                           | 1                          | <0.001                      |
|                                                                         | Disagree          | 268/584 (45.9)                                                                          | 1.08 (0.85–1.39)           |                             | 112/584 (19.2)                                                                                                  | 1.79 (1.27–2.52)           |                             | 34/584 (5.8)                                                                                                        | 3.46 (1.73–6.90)           |                             | 301/584 (51.5)                                                                           | 1.50 (1.15–1.95)           |                             |
|                                                                         | Agree             | 30/52 (57.7)                                                                            | 1.77 (1.09–2.88)           |                             | 27/52 (51.9)                                                                                                    | 7.99 (4.70–13.59)          |                             | 20/52 (38.5)                                                                                                        | 34.11 (16.75–69.48)        |                             | 34/52 (65.4)                                                                             | 2.70 (1.76–4.13)           |                             |
| Strongly agree                                                          | 26/39 (66.7)      | 2.36 (1.21–4.60)                                                                        |                            | 16/39 (41.0)                | 5.24 (2.35–11.69)                                                                                               |                            | 10/39 (25.6)                | 18.64 (6.12–56.81)                                                                                                  |                            | 23/39 (59.0)                | 1.89 (0.99–3.62)                                                                         |                            |                             |
|                                                                         | Missing           | 3/6 (50.0)                                                                              |                            |                             | 1/6 (16.7)                                                                                                      |                            |                             | 0/6 (0.0)                                                                                                           |                            |                             | 4/6 (66.7)                                                                               |                            |                             |

(continued)

SUPPLEMENTARY TABLE S7. (CONTINUED)

| Variable                                                                          | Categories        | <i>I would be ashamed if a young woman in my family became pregnant before marriage</i> |                            |                             | <i>Other people deserve access to health services more than young women who become pregnant before marriage</i> |                            |                             | <i>If I had a choice, I would prefer not to provide services to young women who become pregnant before marriage</i> |                            |                             | <i>Young women who become pregnant before marriage engage in irresponsible behaviors</i> |                            |                             |
|-----------------------------------------------------------------------------------|-------------------|-----------------------------------------------------------------------------------------|----------------------------|-----------------------------|-----------------------------------------------------------------------------------------------------------------|----------------------------|-----------------------------|---------------------------------------------------------------------------------------------------------------------|----------------------------|-----------------------------|------------------------------------------------------------------------------------------|----------------------------|-----------------------------|
|                                                                                   |                   | n/N (%) <sup>*</sup>                                                                    | aOR (95% CIs) <sup>†</sup> | p <sub>w</sub> <sup>‡</sup> | n/N (%) <sup>*</sup>                                                                                            | aOR (95% CIs) <sup>†</sup> | p <sub>w</sub> <sup>‡</sup> | n/N (%) <sup>*</sup>                                                                                                | aOR (95% CIs) <sup>†</sup> | p <sub>w</sub> <sup>‡</sup> | n/N (%) <sup>*</sup>                                                                     | aOR (95% CIs) <sup>†</sup> | p <sub>w</sub> <sup>‡</sup> |
| I would be ashamed if a woman in my family sold sex <sup>h</sup>                  | Strongly disagree | 23/84 (27.4)                                                                            | 1                          | <0.001                      | 11/84 (13.1)                                                                                                    | 1                          | 0.469                       | 7/84 (8.3)                                                                                                          | 1                          | 0.432                       | 23/84 (27.4)                                                                             | 1                          | <0.001                      |
|                                                                                   | Disagree          | 51/225 (22.7)                                                                           | 0.76 (0.46–1.27)           |                             | 32/225 (14.2)                                                                                                   | 1.06 (0.62–1.82)           |                             | 11/225 (4.9)                                                                                                        | 0.56 (0.18–1.75)           |                             | 71/225 (31.6)                                                                            | 1.19 (0.77–1.84)           |                             |
|                                                                                   | Agree             | 295/625 (47.2)                                                                          | 2.36 (1.66–3.36)           |                             | 111/625 (17.8)                                                                                                  | 1.38 (0.83–2.29)           |                             | 37/625 (5.9)                                                                                                        | 0.67 (0.30–1.48)           |                             | 309/625 (49.4)                                                                           | 2.57 (1.53–4.33)           |                             |
|                                                                                   | Strongly agree    | 278/474 (58.6)                                                                          | 3.79 (2.59–5.53)           |                             | 87/474 (18.4)                                                                                                   | 1.45 (0.78–2.73)           |                             | 22/474 (4.6)                                                                                                        | 0.53 (0.23–1.21)           |                             | 264/474 (55.7)                                                                           | 3.34 (2.00–5.57)           |                             |
| Women who sell sex engage in irresponsible behaviors <sup>i</sup>                 | Missing           | 6/24 (25.0)                                                                             |                            |                             | 2/24 (8.3)                                                                                                      |                            |                             | 0/24 (0.0)                                                                                                          |                            |                             | 6/24 (25.0)                                                                              |                            |                             |
|                                                                                   | Strongly disagree | 31/87 (35.6)                                                                            | 1                          | <0.001                      | 12/87 (13.8)                                                                                                    | 1                          | 0.625                       | 2/87 (2.3)                                                                                                          | 1                          | 0.573                       | 15/87 (17.2)                                                                             | 1                          | <0.001                      |
|                                                                                   | Disagree          | 78/255 (30.6)                                                                           | 0.83 (0.53–1.32)           |                             | 39/255 (15.3)                                                                                                   | 1.11 (0.49–2.50)           |                             | 15/255 (5.9)                                                                                                        | 2.59 (0.68–9.83)           |                             | 62/255 (24.3)                                                                            | 1.63 (0.75–3.53)           |                             |
|                                                                                   | Agree             | 354/732 (48.4)                                                                          | 1.74 (1.04–2.93)           |                             | 130/732 (17.8)                                                                                                  | 1.30 (0.59–2.86)           |                             | 40/732 (5.5)                                                                                                        | 2.34 (0.65–8.46)           |                             | 385/732 (52.6)                                                                           | 5.59 (3.12–10.00)          |                             |
| Other people deserve access to services more than women who sell sex <sup>j</sup> | Strongly agree    | 180/310 (58.1)                                                                          | 2.67 (1.49–4.78)           |                             | 56/310 (18.1)                                                                                                   | 1.35 (0.66–2.77)           |                             | 18/310 (5.8)                                                                                                        | 2.54 (0.63–10.31)          |                             | 198/310 (63.9)                                                                           | 9.22 (5.04–16.86)          |                             |
|                                                                                   | Missing           | 10/48 (20.8)                                                                            |                            |                             | 6/48 (12.5)                                                                                                     |                            |                             | 2/48 (4.2)                                                                                                          |                            |                             | 13/48 (27.1)                                                                             |                            |                             |
|                                                                                   | Strongly disagree | 174/449 (38.8)                                                                          | 1                          | <0.001                      | 19/449 (4.2)                                                                                                    | 1                          | <0.001                      | 9/449 (2.0)                                                                                                         | 1                          | <0.001                      | 167/449 (37.2)                                                                           | 1                          | <0.001                      |
|                                                                                   | Disagree          | 350/757 (46.2)                                                                          | 1.34 (1.13–1.59)           |                             | 78/757 (10.3)                                                                                                   | 2.53 (1.51–4.22)           |                             | 29/757 (3.8)                                                                                                        | 1.88 (0.94–3.75)           |                             | 369/757 (48.7)                                                                           | 1.59 (1.29–1.95)           |                             |
| Prefer not to provide services to women who sell sex <sup>k</sup>                 | Agree             | 97/168 (57.7)                                                                           | 2.09 (1.47–2.99)           |                             | 108/168 (64.3)                                                                                                  | 39.85 (20.93–75.86)        |                             | 29/168 (17.3)                                                                                                       | 9.61 (3.91–23.62)          |                             | 103/168 (61.3)                                                                           | 2.62 (1.91–3.60)           |                             |
|                                                                                   | Strongly agree    | 24/44 (54.5)                                                                            | 1.92 (1.00–3.72)           |                             | 32/44 (72.7)                                                                                                    | 60.21 (34.84–104.03)       |                             | 10/44 (22.7)                                                                                                        | 14.31 (7.58–26.99)         |                             | 28/44 (63.6)                                                                             | 3.02 (1.91–4.76)           |                             |
|                                                                                   | Missing           | 8/14 (57.1)                                                                             |                            |                             | 6/14 (42.9)                                                                                                     |                            |                             | 0/14 (0.0)                                                                                                          |                            |                             | 6/14 (42.9)                                                                              |                            |                             |
|                                                                                   | Strongly disagree | 231/546 (42.3)                                                                          | 1                          | 0.021                       | 61/546 (11.2)                                                                                                   | 1                          | <0.001                      | 10/546 (1.8)                                                                                                        | 1                          | <0.001                      | 212/546 (38.8)                                                                           | 1                          | <0.001                      |
| I would be ashamed if a man in my family had sex with other men <sup>l</sup>      | Disagree          | 350/764 (45.8)                                                                          | 1.14 (0.95–1.36)           |                             | 122/764 (16.0)                                                                                                  | 1.47 (1.09–1.98)           |                             | 33/764 (4.3)                                                                                                        | 2.37 (1.05–5.37)           |                             | 387/764 (50.7)                                                                           | 1.61 (1.35–1.91)           |                             |
|                                                                                   | Agree             | 49/85 (57.6)                                                                            | 1.81 (1.23–2.66)           |                             | 38/85 (44.7)                                                                                                    | 6.12 (3.56–10.53)          |                             | 23/85 (27.1)                                                                                                        | 18.90 (10.48–34.08)        |                             | 51/85 (60.0)                                                                             | 2.33 (1.60–3.39)           |                             |
|                                                                                   | Strongly agree    | 17/27 (63.0)                                                                            | 2.27 (0.94–5.47)           |                             | 18/27 (66.7)                                                                                                    | 15.40 (7.13–33.27)         |                             | 11/27 (40.7)                                                                                                        | 34.38 (15.88–74.43)        |                             | 19/27 (70.4)                                                                             | 3.80 (2.16–6.70)           |                             |
|                                                                                   | Missing           | 6/10 (60.0)                                                                             |                            |                             | 4/10 (40.0)                                                                                                     |                            |                             | 0/10 (0.0)                                                                                                          |                            |                             | 4/10 (40.0)                                                                              |                            |                             |
| I would be ashamed if a man in my family had sex with other men <sup>l</sup>      | Strongly disagree | 26/82 (31.7)                                                                            | 1                          | <0.001                      | 12/82 (14.6)                                                                                                    | 1                          | 0.597                       | 4/82 (4.9)                                                                                                          | 1                          | 0.915                       | 22/82 (26.8)                                                                             | 1                          | <0.001                      |
|                                                                                   | Disagree          | 56/233 (24.0)                                                                           | 0.70 (0.41–1.19)           |                             | 35/233 (15.0)                                                                                                   | 1.02 (0.52–2.02)           |                             | 11/233 (4.7)                                                                                                        | 0.99 (0.31–3.21)           |                             | 64/233 (27.5)                                                                            | 1.04 (0.50–2.20)           |                             |
|                                                                                   | Agree             | 265/555 (47.7)                                                                          | 1.95 (1.08–3.54)           |                             | 101/555 (18.2)                                                                                                  | 1.26 (0.55–2.86)           |                             | 34/555 (6.1)                                                                                                        | 1.24 (0.41–3.69)           |                             | 271/555 (48.8)                                                                           | 2.58 (1.49–4.47)           |                             |
|                                                                                   | Strongly agree    | 299/534 (56.0)                                                                          | 2.73 (1.54–4.84)           |                             | 93/534 (17.4)                                                                                                   | 1.20 (0.55–2.66)           |                             | 27/534 (5.1)                                                                                                        | 1.01 (0.33–3.15)           |                             | 308/534 (57.7)                                                                           | 3.69 (2.20–6.19)           |                             |
| Missing                                                                           | 7/28 (25.0)       |                                                                                         |                            | 2/28 (7.1)                  |                                                                                                                 |                            | 1/28 (3.6)                  |                                                                                                                     |                            | 8/28 (28.6)                 |                                                                                          |                            |                             |

(continued)

SUPPLEMENTARY TABLE S7. (CONTINUED)

| Variable                                                           | Categories        | <i>I would be ashamed if a young woman in my family became pregnant before marriage</i> |                            |                             | <i>Other people deserve access to health services more than young women who become pregnant before marriage</i> |                            |                             | <i>If I had a choice, I would prefer not to provide services to young women who become pregnant before marriage</i> |                            |                             | <i>Young women who become pregnant before marriage engage in irresponsible behaviors</i> |                            |                             |
|--------------------------------------------------------------------|-------------------|-----------------------------------------------------------------------------------------|----------------------------|-----------------------------|-----------------------------------------------------------------------------------------------------------------|----------------------------|-----------------------------|---------------------------------------------------------------------------------------------------------------------|----------------------------|-----------------------------|------------------------------------------------------------------------------------------|----------------------------|-----------------------------|
|                                                                    |                   | n/N (%) <sup>*</sup>                                                                    | aOR (95% CIs) <sup>†</sup> | p <sub>w</sub> <sup>‡</sup> | n/N (%) <sup>*</sup>                                                                                            | aOR (95% CIs) <sup>†</sup> | p <sub>w</sub> <sup>‡</sup> | n/N (%) <sup>*</sup>                                                                                                | aOR (95% CIs) <sup>†</sup> | p <sub>w</sub> <sup>‡</sup> | n/N (%) <sup>*</sup>                                                                     | aOR (95% CIs) <sup>†</sup> | p <sub>w</sub> <sup>‡</sup> |
| MSM engage in irresponsible behaviors <sup>m</sup>                 | Strongly disagree | 35/93 (37.6)                                                                            | 1                          | <b>&lt;0.001</b>            | 14/93 (15.1)                                                                                                    | 1                          | 0.153                       | 5/93 (5.4)                                                                                                          | 1                          | 0.910                       | 20/93 (21.5)                                                                             | 1                          | <b>&lt;0.001</b>            |
|                                                                    | Disagree          | 97/321 (30.2)                                                                           | 0.75 (0.49–1.16)           |                             | 46/321 (14.3)                                                                                                   | 0.94 (0.48–1.85)           |                             | 15/321 (4.7)                                                                                                        | 0.87 (0.26–2.93)           |                             | 94/321 (29.3)                                                                            | 1.56 (0.67–3.63)           |                             |
|                                                                    | Agree             | 329/644 (51.1)                                                                          | 1.73 (1.19–2.52)           |                             | 113/644 (17.5)                                                                                                  | 1.16 (0.69–1.96)           |                             | 35/644 (5.4)                                                                                                        | 0.96 (0.34–2.71)           |                             | 352/644 (54.7)                                                                           | 4.44 (2.27–8.69)           |                             |
|                                                                    | Strongly agree    | 169/295 (57.3)                                                                          | 2.20 (1.52–3.19)           |                             | 59/295 (20.0)                                                                                                   | 1.38 (0.83–2.28)           |                             | 18/295 (6.1)                                                                                                        | 1.11 (0.37–3.35)           |                             | 189/295 (64.1)                                                                           | 6.42 (3.09–13.34)          |                             |
|                                                                    | Missing           | 23/79 (29.1)                                                                            |                            |                             | 11/79 (13.9)                                                                                                    |                            |                             | 4/79 (5.1)                                                                                                          |                            |                             | 18/79 (22.8)                                                                             |                            |                             |
| Other people deserve access to services more than MSM <sup>n</sup> | Strongly disagree | 183/457 (40.0)                                                                          | 1                          | <b>&lt;0.001</b>            | 23/457 (5.0)                                                                                                    | 1                          | <b>&lt;0.001</b>            | 7/457 (1.5)                                                                                                         | 1                          | <b>&lt;0.001</b>            | 172/457 (37.6)                                                                           | 1                          | <b>&lt;0.001</b>            |
|                                                                    | Disagree          | 331/735 (45.0)                                                                          | 1.21 (0.97–1.51)           |                             | 65/735 (8.8)                                                                                                    | 1.76 (1.04–2.97)           |                             | 30/735 (4.1)                                                                                                        | 2.65 (1.45–4.84)           |                             | 358/735 (48.7)                                                                           | 1.55 (1.24–1.95)           |                             |
|                                                                    | Agree             | 101/159 (63.5)                                                                          | 2.59 (1.88–3.58)           |                             | 110/159 (69.2)                                                                                                  | 42.66 (19.34–94.06)        |                             | 28/159 (17.6)                                                                                                       | 13.00 (4.52–37.35)         |                             | 93/159 (58.5)                                                                            | 2.34 (1.58–3.47)           |                             |
|                                                                    | Strongly agree    | 30/57 (52.6)                                                                            | 1.56 (1.00–2.42)           |                             | 33/57 (57.9)                                                                                                    | 25.14 (13.40–47.17)        |                             | 9/57 (15.8)                                                                                                         | 11.55 (3.73–35.80)         |                             | 42/57 (73.7)                                                                             | 4.39 (2.30–8.38)           |                             |
|                                                                    | Missing           | 8/24 (33.3)                                                                             |                            |                             | 12/24 (50.0)                                                                                                    |                            |                             | 3/24 (12.5)                                                                                                         |                            |                             | 8/24 (33.3)                                                                              |                            |                             |
| Prefer not to provide services to MSM <sup>o</sup>                 | Strongly disagree | 204/505 (40.4)                                                                          | 1                          | <b>&lt;0.001</b>            | 56/505 (11.1)                                                                                                   | 1                          | <b>&lt;0.001</b>            | 10/505 (2.0)                                                                                                        | 1                          | <b>&lt;0.001</b>            | 190/505 (37.6)                                                                           | 1                          | <b>&lt;0.001</b>            |
|                                                                    | Disagree          | 358/778 (46.0)                                                                          | 1.22 (0.97–1.53)           |                             | 121/778 (15.6)                                                                                                  | 1.43 (0.94–2.18)           |                             | 27/778 (3.5)                                                                                                        | 1.71 (0.78–3.76)           |                             | 397/778 (51.0)                                                                           | 1.68 (1.34–2.12)           |                             |
|                                                                    | Agree             | 57/87 (65.5)                                                                            | 2.78 (1.70–4.55)           |                             | 44/87 (50.6)                                                                                                    | 8.06 (4.04–16.09)          |                             | 28/87 (32.2)                                                                                                        | 22.55 (9.96–51.05)         |                             | 48/87 (55.2)                                                                             | 2.04 (1.44–2.90)           |                             |
|                                                                    | Strongly agree    | 29/48 (60.4)                                                                            | 2.08 (1.17–3.71)           |                             | 18/48 (37.5)                                                                                                    | 4.76 (2.93–7.72)           |                             | 11/48 (22.9)                                                                                                        | 14.34 (4.69–43.85)         |                             | 34/48 (70.8)                                                                             | 3.79 (1.95–7.37)           |                             |
|                                                                    | Missing           | 5/14 (35.7)                                                                             |                            |                             | 4/14 (28.6)                                                                                                     |                            |                             | 1/14 (7.1)                                                                                                          |                            |                             | 4/14 (28.6)                                                                              |                            |                             |

\*Proportion of health workers responding strongly agree or agree.

<sup>†</sup>The aOR for sex is adjusted for age group; the aOR for age group is adjusted for sex; the aOR for all other predictor variables is adjusted for sex and age group.

<sup>‡</sup>A *p* value of <0.05 indicates that the predictor creates a statistically significant improvement in the fit of the model.

<sup>§</sup>Infection control and universal precautions (including postexposure prophylaxis and waste management).

<sup>||</sup>My coworkers sometimes treat people living with HIV poorly when providing them.

<sup>¶</sup>My coworkers sometimes talk badly about people thought to be living with HIV.

<sup>||</sup>I would be ashamed if a woman in my family was PLHIV.

<sup>¶</sup>PLHIV engage in irresponsible behaviors.

<sup>||</sup>Other people deserve access to health services more than PLHIV.

<sup>¶</sup>If I had a choice, I would prefer not to provide services to PLHIV.

<sup>||</sup>I would be ashamed if a woman in my family was a woman who sells sex.

<sup>¶</sup>Women who sell sex engage in irresponsible behaviors.

<sup>||</sup>Other people deserve access to health services more than women who sell sex.

<sup>¶</sup>If I had a choice, I would prefer not to provide services to women who sell sex.

<sup>||</sup>I would be ashamed if a member of my family was a man who has sex with men.

<sup>m</sup>MSM engage in irresponsible behaviors.

<sup>n</sup>Other people deserve access to health services more than MSM.

<sup>o</sup>If I had a choice, I would prefer not to provide services to MSM.

aOR, adjusted odds ratio; CIs, confidence intervals; MSM, men who have sex with men; *n*, number of individuals reporting the four stigmas within groups; *N*, total number of individuals within groups; PLHIV, people living with HIV; *p<sub>w</sub>*, *p* value of the Wald test.

*p*-Values marked in bold indicate numbers that are significant on the 95% confidence limit.
